# Supplementary material for: PCLAF-DREAM drives alveolar cell plasticity for lung regeneration
Source: PubMed Central journal article supplement (PMC11502753; doi:10.1038/s41467-024-53330-1), 2024-10-24
Supplement: 41467_2024_53330_MOESM1_ESM.pdf [file 41467_2024_53330_MOESM1_ESM.pdf]

1 **List of Supplementary Materials**

2  
3  
4 **Supplementary Figures 1 to 20**

5  
6  
7 **Supplementary Figures**

- 8  
9 **Supplementary Fig. 1. Cell type annotation of human and mouse lung single-cell transcriptomics**  
10 **Supplementary Fig. 2. Experimental scheme for generating *Pclaf-LacZ* mice**  
11 **Supplementary Fig. 3. *Pclaf* KO inhibits AT1 regeneration and promotes AT2 repopulation.**  
12 **Supplementary Fig. 4. Lung organoid culture system**  
13 **Supplementary Fig. 5. *Pclaf* KO inhibits alveolar-type lung organoid formation.**  
14 **Supplementary Fig. 6. Scheme of single-cell transcriptomics of *Pclaf* WT and KO mouse lung tissues**  
15 **Supplementary Fig. 7. Cell type annotation of mouse lung single-cell transcriptomics**  
16 **Supplementary Fig. 8. *Pclaf* KO-impaired cell lineage trajectory from AT2 cells to AT1 cells**  
17 **Supplementary Fig. 9. PAPCs express various lung epithelial cell markers.**  
18 **Supplementary Fig. 10. Both germline and conditional KO of *Pclaf* inhibit AT1 cell generation from**  
19 **AT2 cells**  
20 **Supplementary Fig. 11. *Pclaf* KO downregulates DREAM-target gene expression in PAPC.**  
21 **Supplementary Fig. 12. Transduction efficiency of lentiviruses encoding Lin52-WT or Lin52 S28A in**  
22 **LOs**  
23 **Supplementary Fig. 13. Impact of *Pclaf* KO on Wnt signaling, Sox9, and Myc transcriptional**  
24 **signatures**  
25 **Supplementary Fig. 14. *Clic4* downregulation is associated with decreased activity of TGF- $\beta$  signaling**  
26 **in *Pclaf* KO PAPCs.**  
27 **Supplementary Fig. 15. Pharmacological or genetic activation of the DREAM axis rescues *Pclaf* KO-**  
28 **inhibited TGF- $\beta$  signaling.**  
29 **Supplementary Fig. 16. TGF- $\beta$  rescues *Pclaf* KO-impaired cell plasticity.**  
30 **Supplementary Fig. 17. Elevated TGF- $\beta$  signaling in inflamed lesions of *Pclaf* KO lung tissues**  
31 **Supplementary Fig. 18. Elevated TGF- $\beta$  signaling in lung fibroblasts of IPF patients**  
32 **Supplementary Fig. 19. Phenelzine promotes LO formation.**  
33 **Supplementary Fig. 20. Source data**  
34  
35  
36  
37  
38  
39  
40  
41  
42

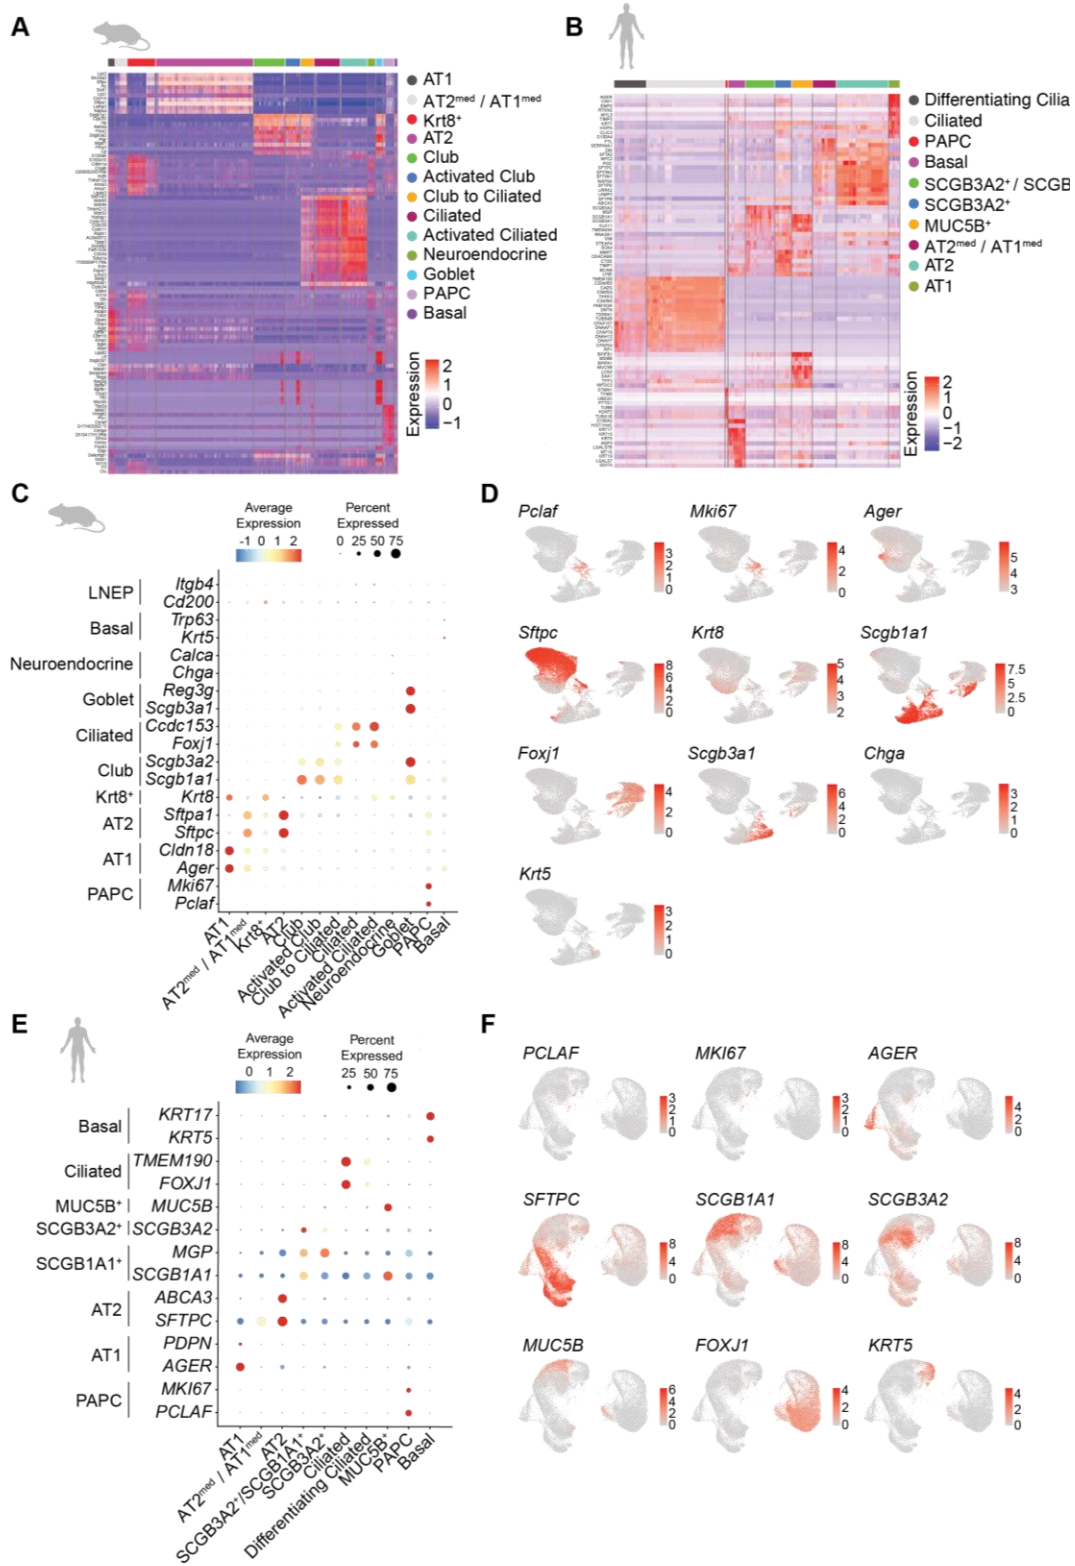

43 **Supplementary Fig. 1. Cell type annotation of human and mouse lung single-cell transcriptomics**  
 44 **A** Heatmap of gene expression of the top 10 genes in each cell type of mouse lung using data shown in Figure  
 45 1A. **B** Heatmap of gene expression of the top 10 genes in each cell type of human lung using data shown in  
 46 Figure 1D. **C** Dot plots for mouse lung epithelial marker gene expression in each cell type. **D** Feature plots of  
 47 mouse lung epithelial marker gene expression. **E** Dot plots for human lung epithelial marker gene expression  
 48 in each cell type. **F** Feature plots of human lung epithelial marker gene expression. Graphic icons were created  
 49 with BioRender.com.

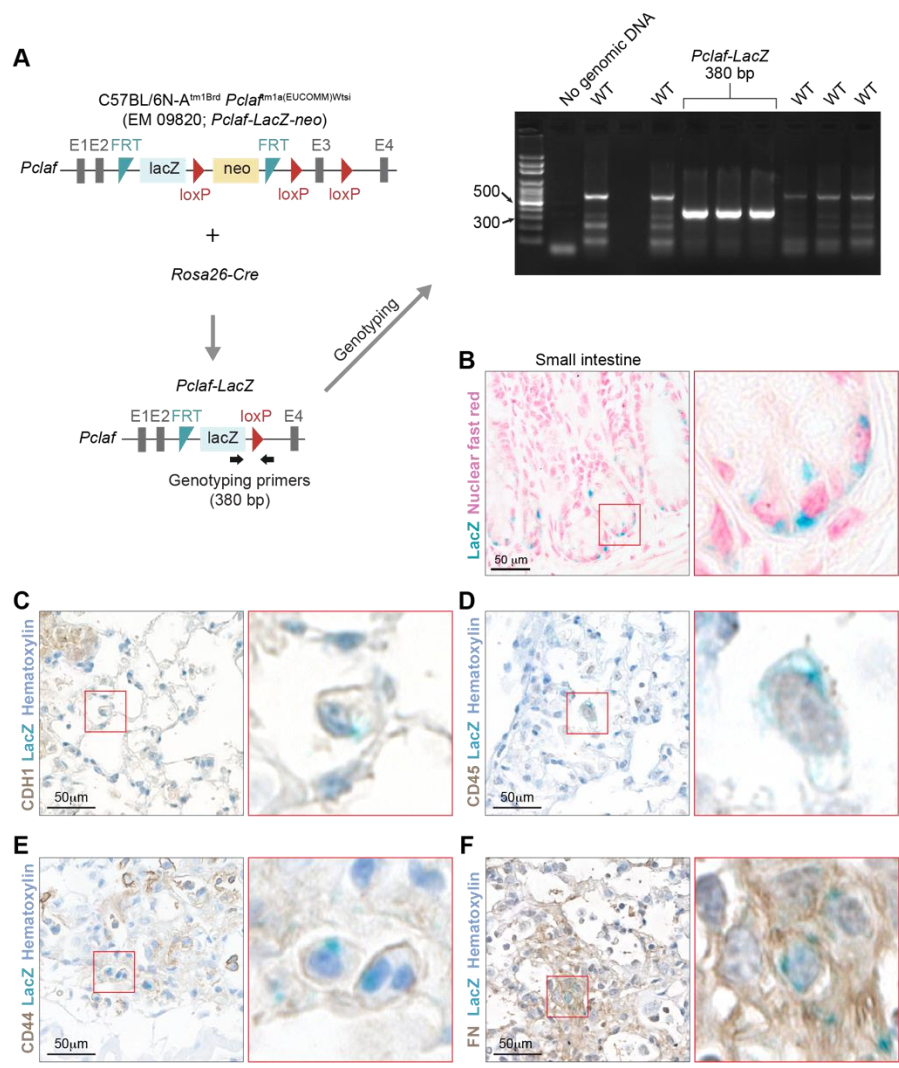

51 **Supplementary Fig. 2. Experimental scheme for generating *Pclaf-LacZ* mice**  
 52 **A** Experimental scheme for generating *Pclaf-LacZ* mice. C57BL/6N-A<sup>tm1Brd</sup> *Pclaf*<sup>f1a(EUCOMM)Wtsi</sup>/WtsiPh mice were  
 53 bred with the *Rosa26-Cre* strain. The *Pclaf-LacZ* allele was confirmed by PCR-based genotyping. **B**  
 54 Representative image of X-gal staining of the small intestine where PCLAF is specifically expressed in the crypt  
 55 1. PCLAF-LacZ was expressed in the crypt base columnar cells. **C-F** *Pclaf-LacZ* mice were treated with  
 56 bleomycin (1.4 U/kg, by intratracheal instillation). At 7 dpi, lungs were collected and processed for  
 57 immunostaining: epithelial cell (**C**; CDH1), immune cell (**D**; CD45), or mesenchymal cell (**E**; CD44 and **F**;  
 58 fibronectin (FN)) in combination with X-gal staining. Represented images are shown (n≥3). Panel A was created  
 59 with BioRender.com.

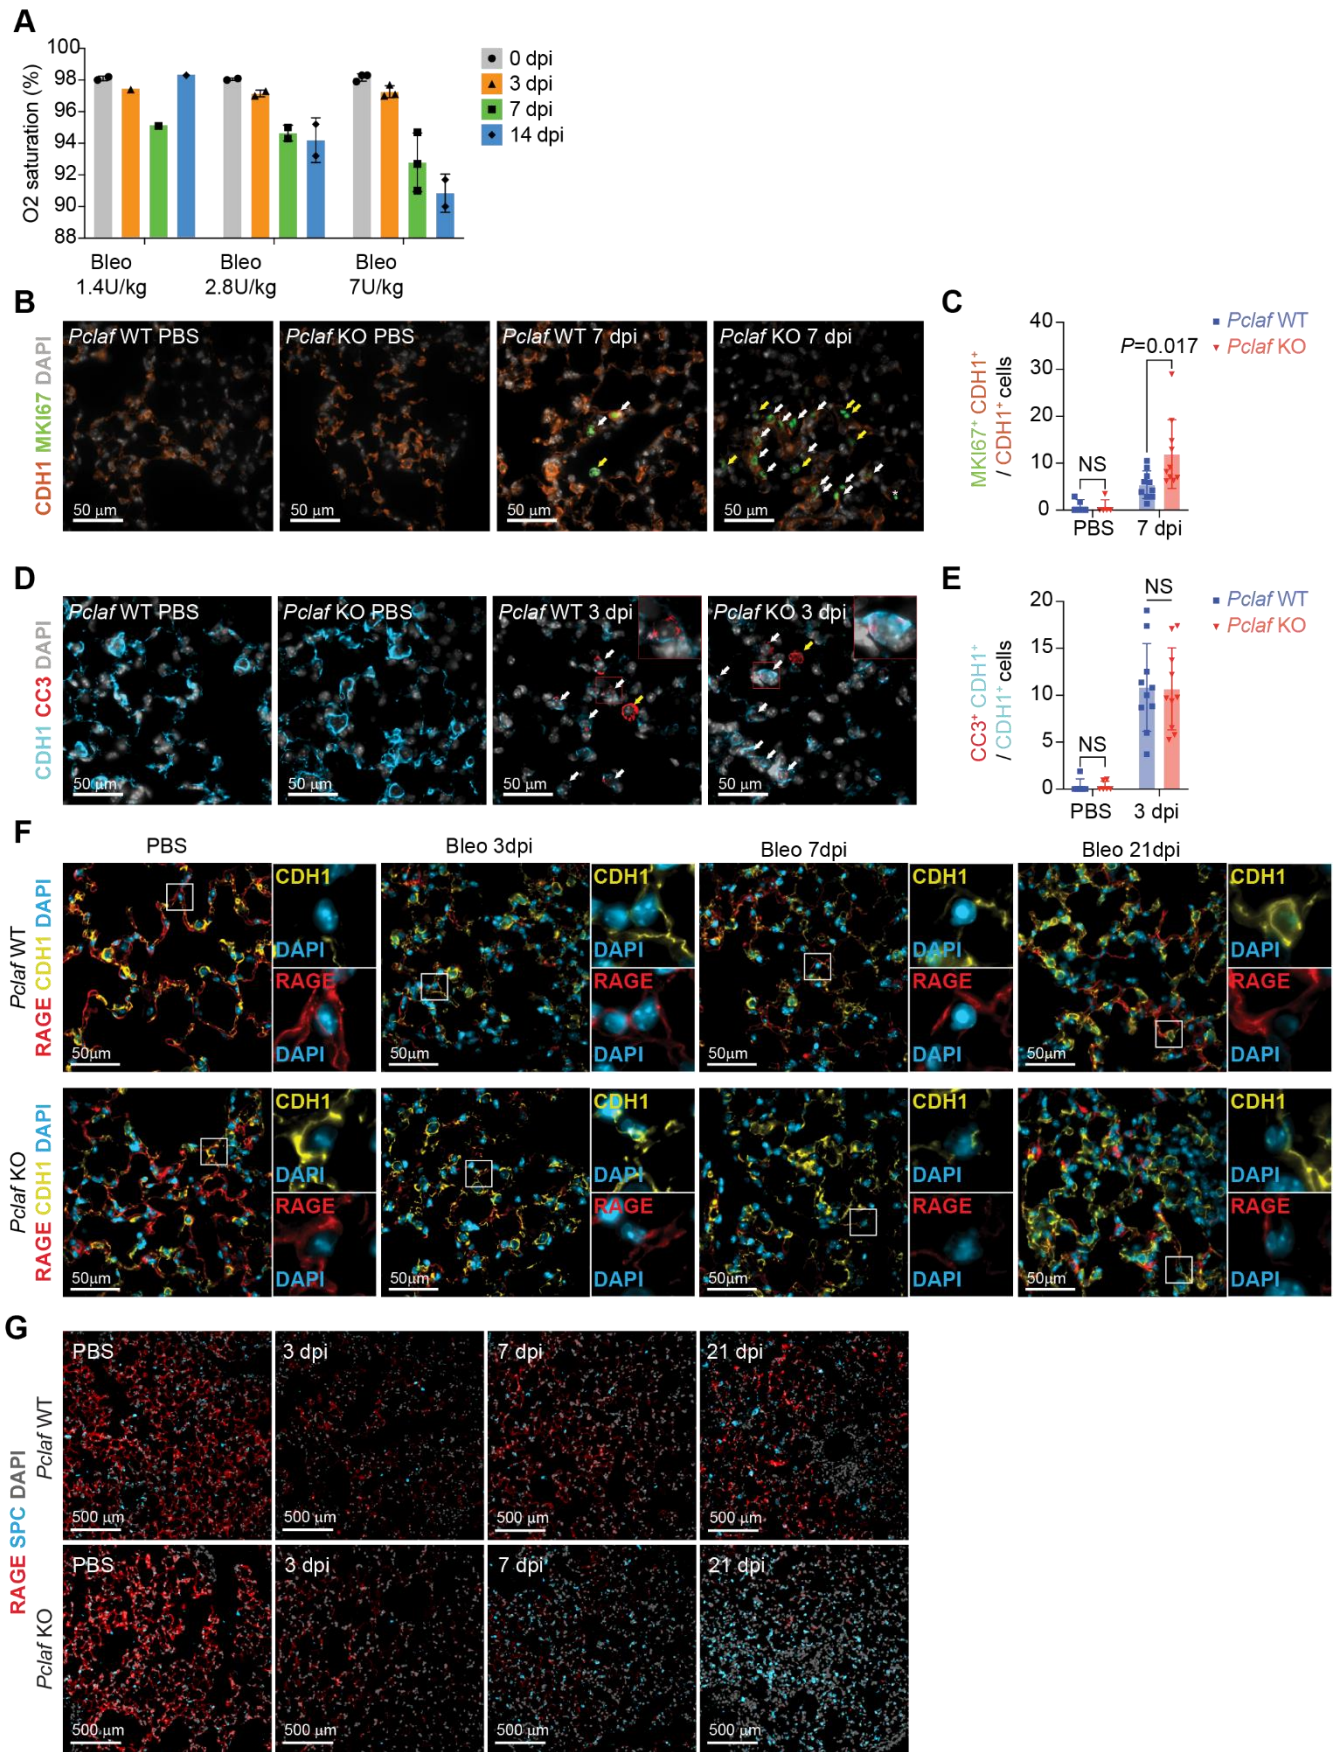

Supplementary Fig. 3. *Pclaf* KO inhibits AT1 regeneration and promotes AT2 repopulation.

62 **A** 8-week-old C57BL/6 mice were treated with bleomycin (1.4 U/kg; 0 dpi [n=2], 3, 7, 21 dpi [each n=1], 2.8 U/kg;  
63 n=2, 7.0 U/kg; n=3; intratracheal instillation). The dynamics of SpO<sub>2</sub> levels were measured by pulse-oximetry at  
64 the indicated time points. One mouse instilled with bleomycin (1.4 U/kg) was dead at 1 dpi. Mouse instilled with  
65 1.4 U/kg bleomycin showed recovered SpO<sub>2</sub> level back to levels of 0 dpi at 14 dpi, while mice with 2.8 U/kg or 7  
66 U/kg of bleomycin showed inhibited SpO<sub>2</sub> level at 14 dpi. **B-G** Experimental scheme for the bleomycin-induced  
67 lung injury model. *Pclaf* WT and KO mice were treated with phosphate-buffered saline (PBS) (n=5 for *Pclaf* WT,  
68 n=5 for *Pclaf* KO) or bleomycin (1.4 U/kg; n=10 for *Pclaf* WT, n=10 for *Pclaf* KO) by intratracheal instillation.  
69 Representative images of immunostaining for CDH1 and MKI67 at indicated time points (**B**). Quantification graph  
70 of CDH1<sup>+</sup>/MKI67<sup>+</sup> cells / CDH1<sup>+</sup> cells (**C**). Representative images of immunostaining for CDH1 and cleaved  
71 caspase 3 (CC3) at indicated time points (**D**). Quantification graph of CDH1<sup>+</sup>/CC3<sup>+</sup> cells / CDH1<sup>+</sup> cells (**E**).  
72 Representative images of immunostaining for RAGE and CDH1 at indicated time points (**F**). Representative  
73 images of immunostaining for RAGE and SPC at indicated time points (**G**). Represented images are shown (n≥3).  
74

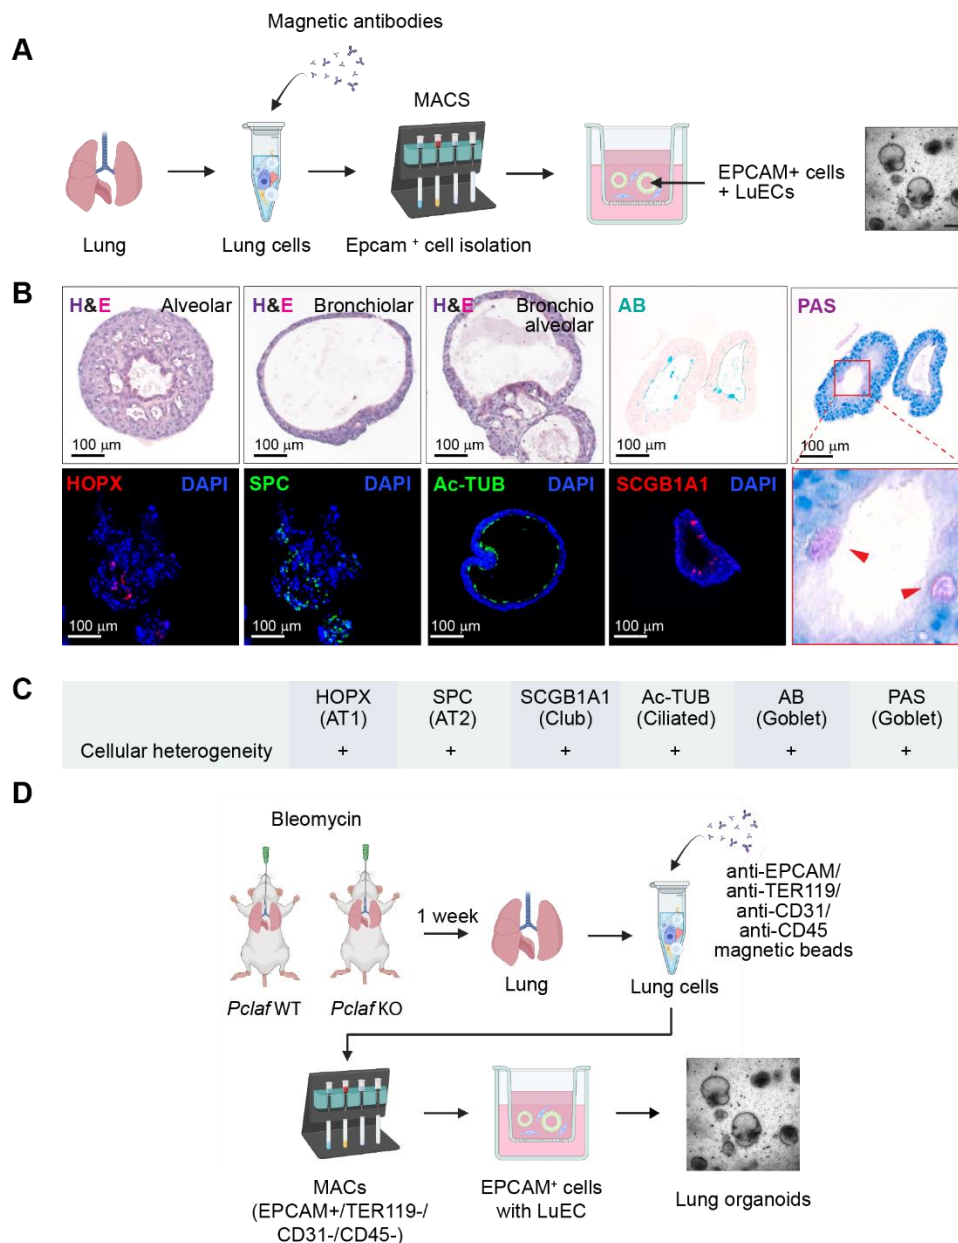

**Supplementary Fig. 4. Lung organoid culture system**

**A** Scheme of LO culture. The lung epithelial cells were isolated from WT mice by magnetic-activated cell sorting (MACS) and cultured with LuECs at a liquid-air interface to grow LOs. **B** Representative images of organoids for hematoxylin and eosin (H&E), alcian blue (AB), and periodic acid-Schiff (PAS) staining (*upper panels*), and immunostained for HOPX (AT1 cells), SPC (AT2 cells), acetyl-Tubulin (Ac-TUB; Ciliated cells), and SCGB1A1 (Club cells) of organoids with LuECs. **C** Table of positive cells using data shown in Supplementary Fig 4B. **D** Scheme of LO culture. The lung epithelial cells were isolated from bleomycin-treated lungs of *Pclaf* WT or *Pclaf* KO mice at 7 dpi by MACS. The lung epithelial cells (TER119<sup>-</sup>/CD31<sup>-</sup>/CD45<sup>-</sup>/EPCAM<sup>+</sup>) were cultured with lung endothelial cells (CD31<sup>+</sup>) at a liquid-air interface to generate LOs. Represented images are shown ( $n \geq 3$ ). Panel A and D were created with BioRender.com.

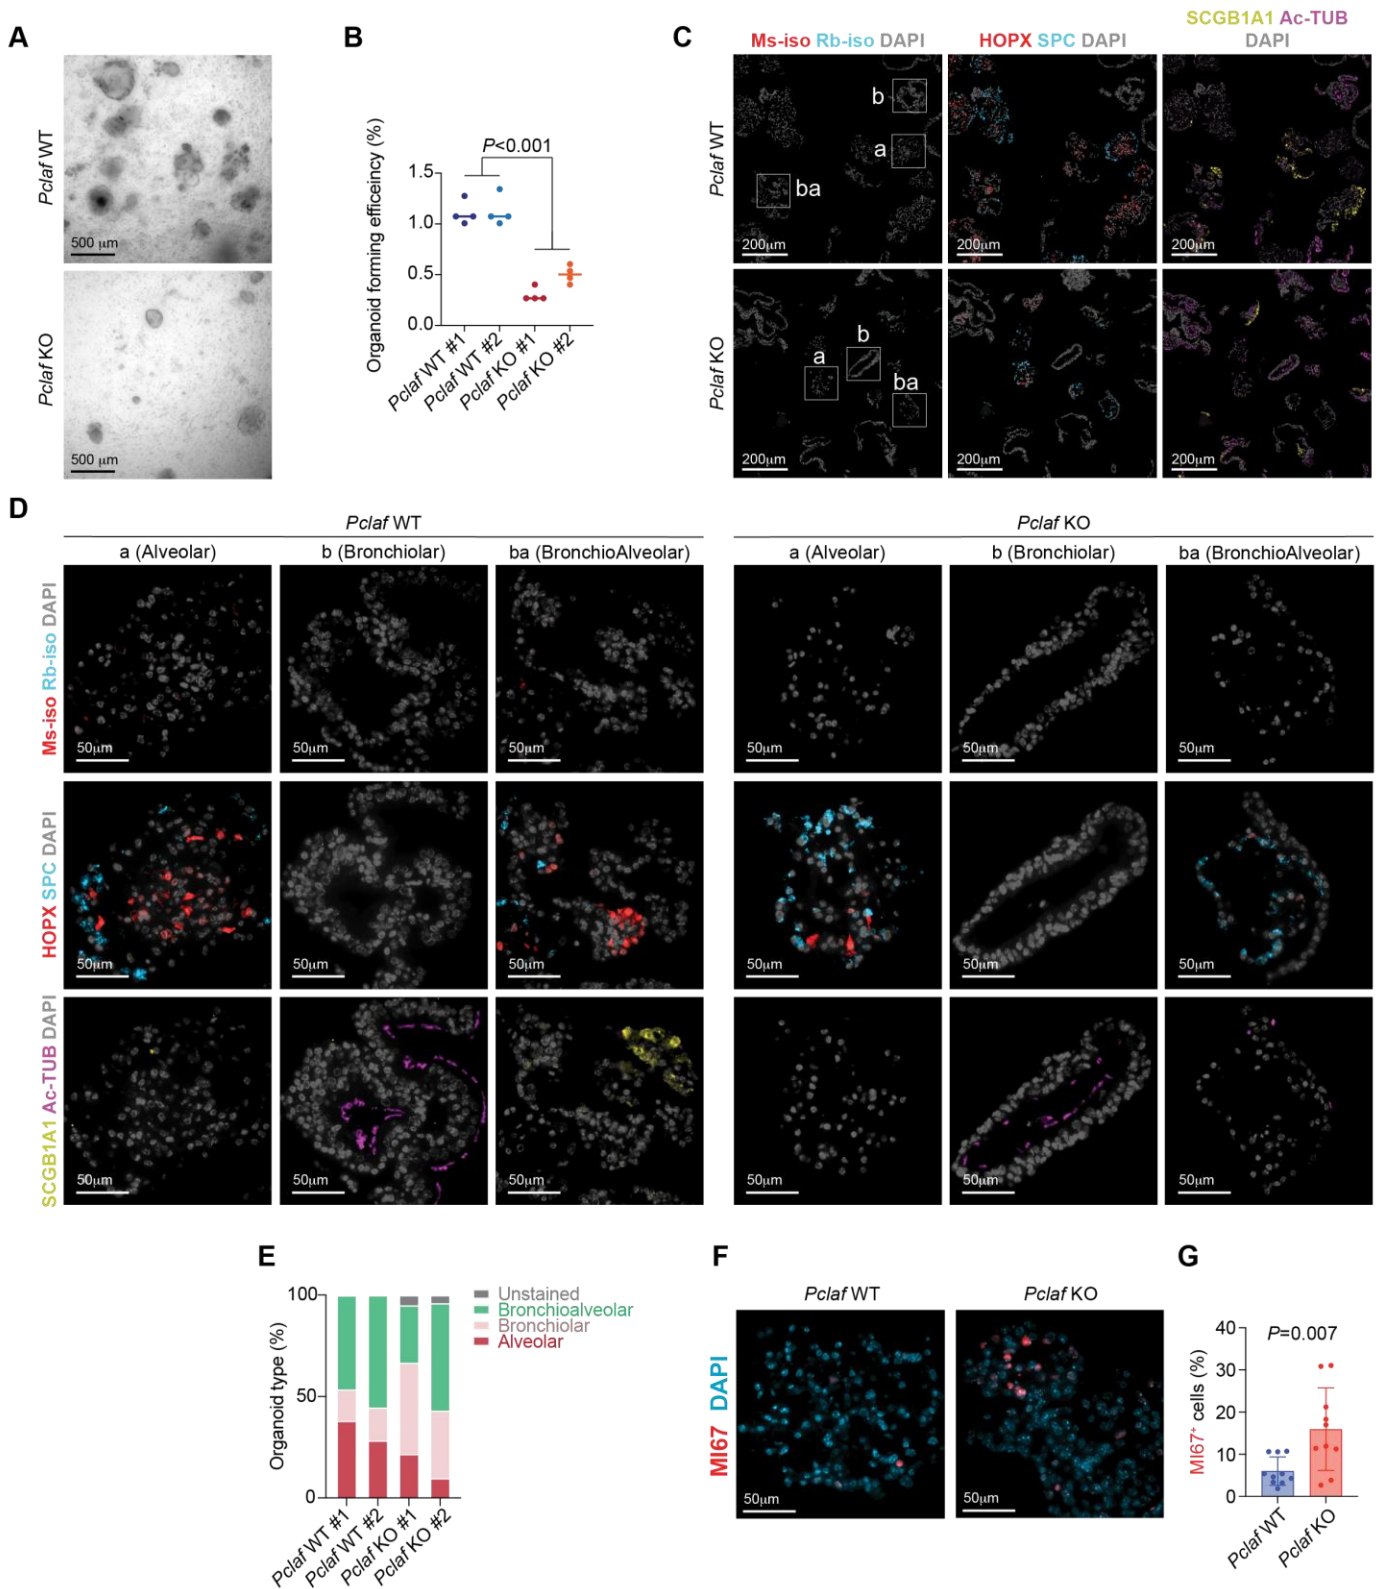

**Supplementary Fig. 5. *Pclaf* KO inhibits alveolar-type lung organoid formation.**

The lung epithelial cells were isolated from bleomycin-treated lungs of *Pclaf* WT or *Pclaf* KO mice at 7 dpi (bleomycin administration) by magnetic-activated cell sorting (MACS). The lung epithelial cells (TER119/CD31<sup>-</sup>/CD45<sup>-</sup>/EPCAM<sup>+</sup>) were cultured with lung endothelial cells (CD31<sup>+</sup>) at a liquid-air interface to generate LOs. **A** Bright-field z-stack images of LOs at day 12 (n=4). **B** Quantification graph of lung organoid forming efficiency (OFE). **C** Representative images of LOs that were immunostained for RAGE (AT1 cells), SPC (AT2 cells) Ac-TUB (Ciliated cells), and SCGB1A1 (Club cells). Isotype-controls (rabbit IgG for SPC and SCGB1A1, mouse IgG

97 for HOPX and Ac-TUB) served as negative controls. Serial sections were used for isotype-control, HOPX and  
98 SPC, and Ac-TUB and SCGB1A1 staining. a; alveolar, b; bronchiolar, ba; bronchioalveolar. **D** High  
99 magnification images of each alveolar, bronchiolar, and bronchioalveolar organoids shown and indicated in  
100 Supplementary Figure 5C. **E** Quantification graph of organoid type. #1 and #2 indicate two independent  
101 experiment sets. **F** Representative images of LOs that were immunostained for MKI67 (n=10). **G** Quantification  
102 graph of MKI67<sup>+</sup> cells / DAPI<sup>+</sup> cells. Two-tailed Student's *t*-test; error bars: SD. Represented images and data  
103 are shown (n≥3).



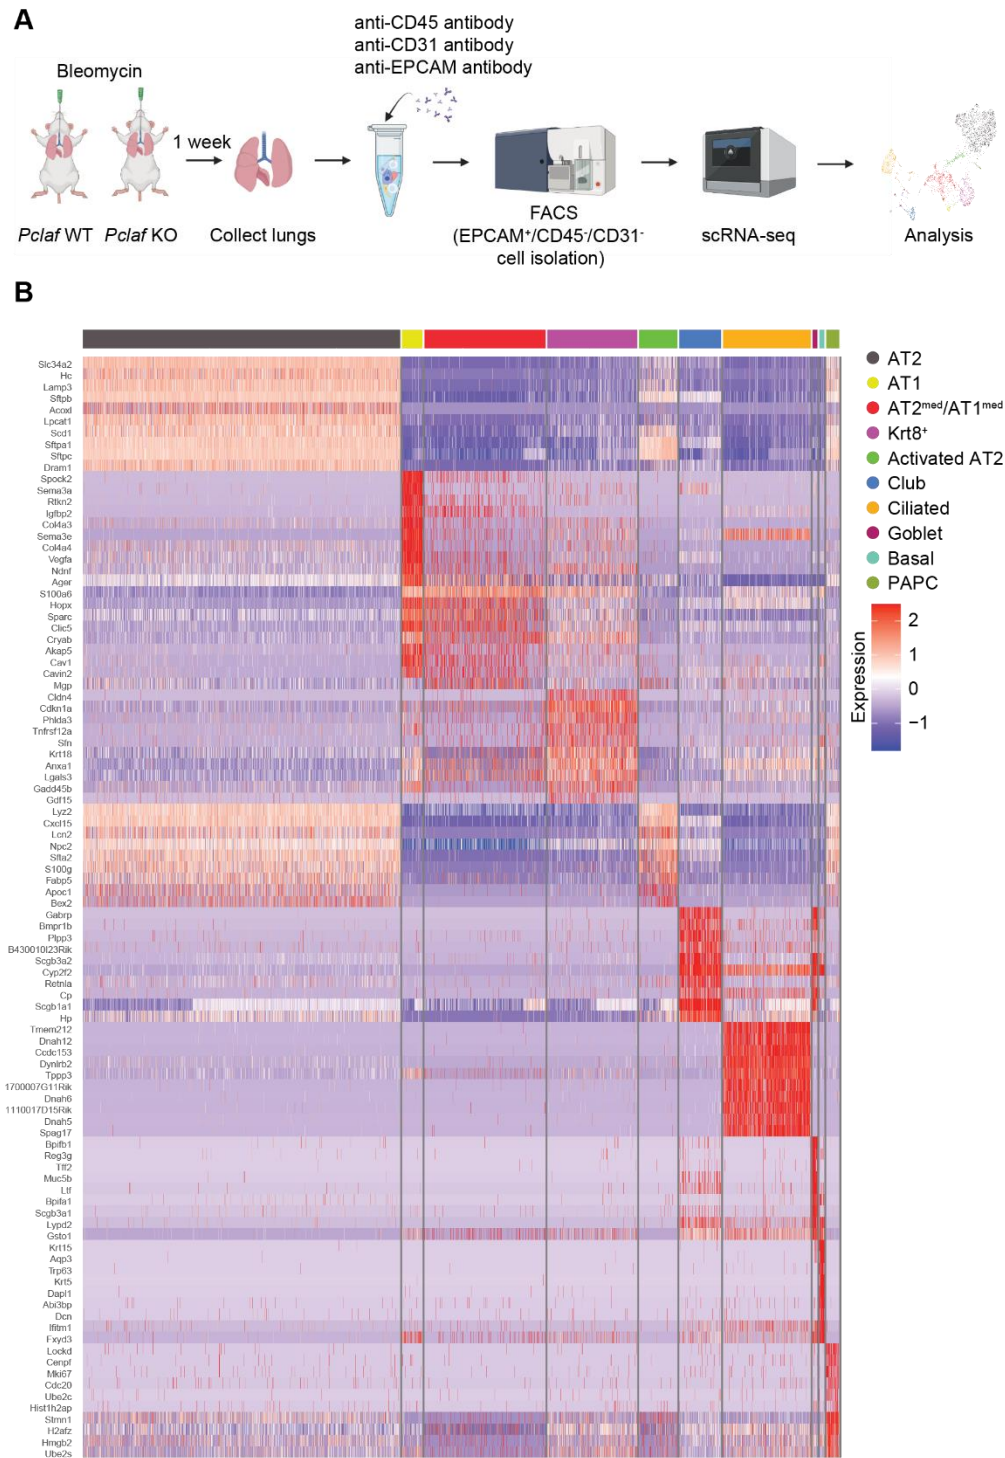

104  
105  
106  
107  
108  
109  
110

**Supplementary Fig. 6. Scheme of single-cell transcriptomics of *Pclaf* WT and KO mouse lung tissues**  
**A** Scheme of scRNA-seq. Lung epithelial cells were isolated from *Pclaf* WT and KO mice (treated with bleomycin) by fluorescence-activated cell sorting (FACS). CD31<sup>-</sup>/CD45<sup>-</sup>/EPCAM<sup>+</sup> cells were used to generate sequencing data using the 10X Genomics single-cell sequencing platform. **B** Heatmap of gene expression-based cell clusters of the top 10 genes in each cell type of mouse lung using data shown in Figure 3B. Panel A was created with BioRender.com.

**A**

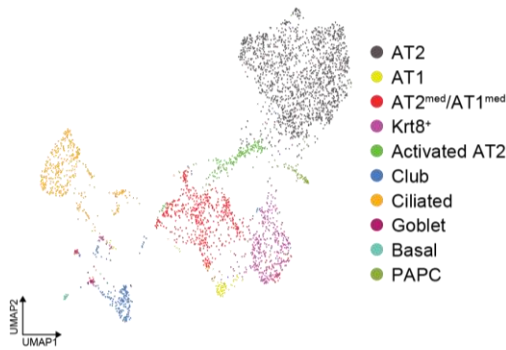

**B**

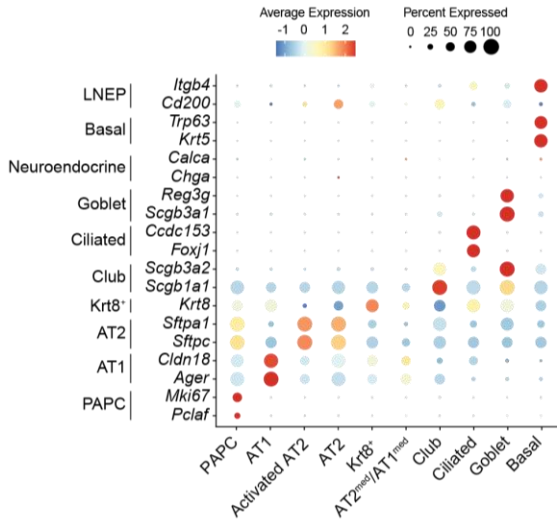

**C**

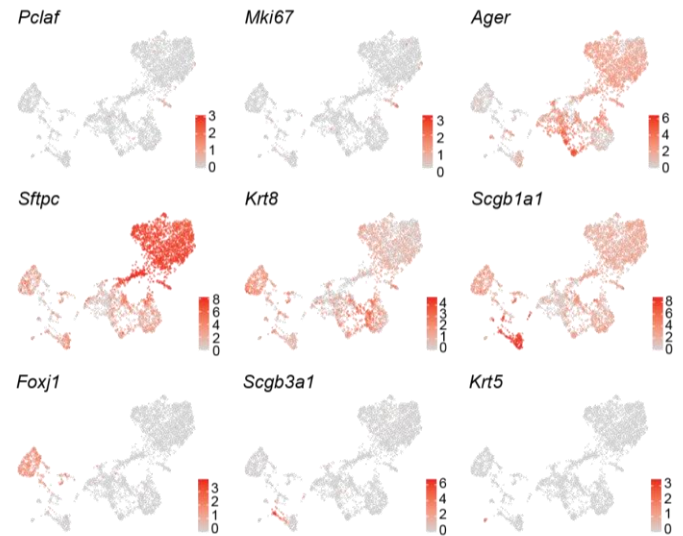

**D**

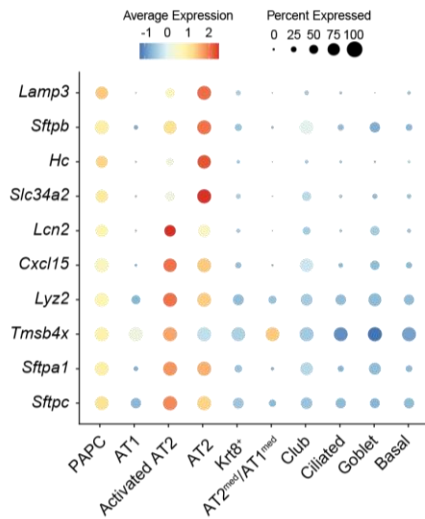

**E**

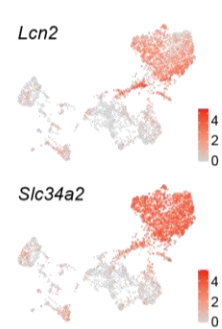

**F**

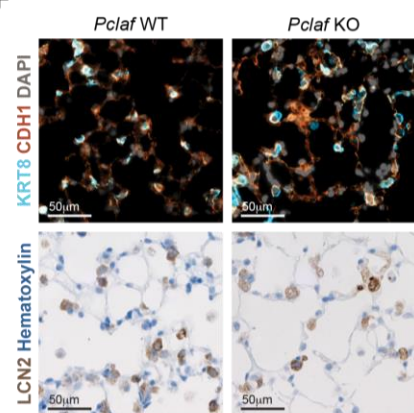

**Supplementary Fig. 7. Cell type annotation of mouse lung single-cell transcriptomics**

Analysis of the scRNA-seq dataset is shown in Figure 3B. **A** UMAP displays each cell cluster, colored by cell type. **B** Dot plots for mouse lung epithelial marker gene expression quantification of each cell type. **C** Feature plots of mouse lung epithelial marker gene expression. **D** Dot plots for genes specifically expressed in AT2 and activated AT2 cells. **E** Feature plots displaying the expression of *Lcn2* and *Slc34a2*. **F** Representative images of immunostaining for KRT8 and CDH1, or LCN2 using lung slides at 7 dpi as shown in Figure 2. Represented images and data are shown (n≥3).

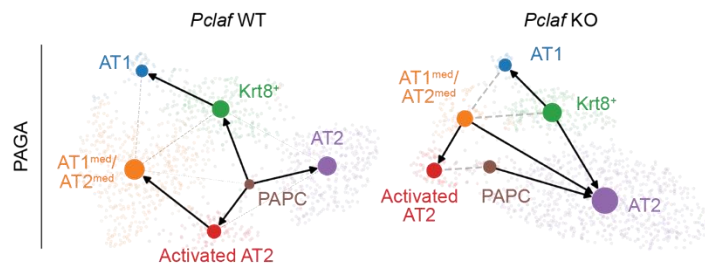

118  
119  
120  
121

**Supplementary Fig. 8. *Pclaf* KO-impaired cell lineage trajectory from AT2 cells to AT1 cells**

Partition-based graph abstraction (PAGA) analysis using the results of RNA velocity analysis shown in Figure 3C.

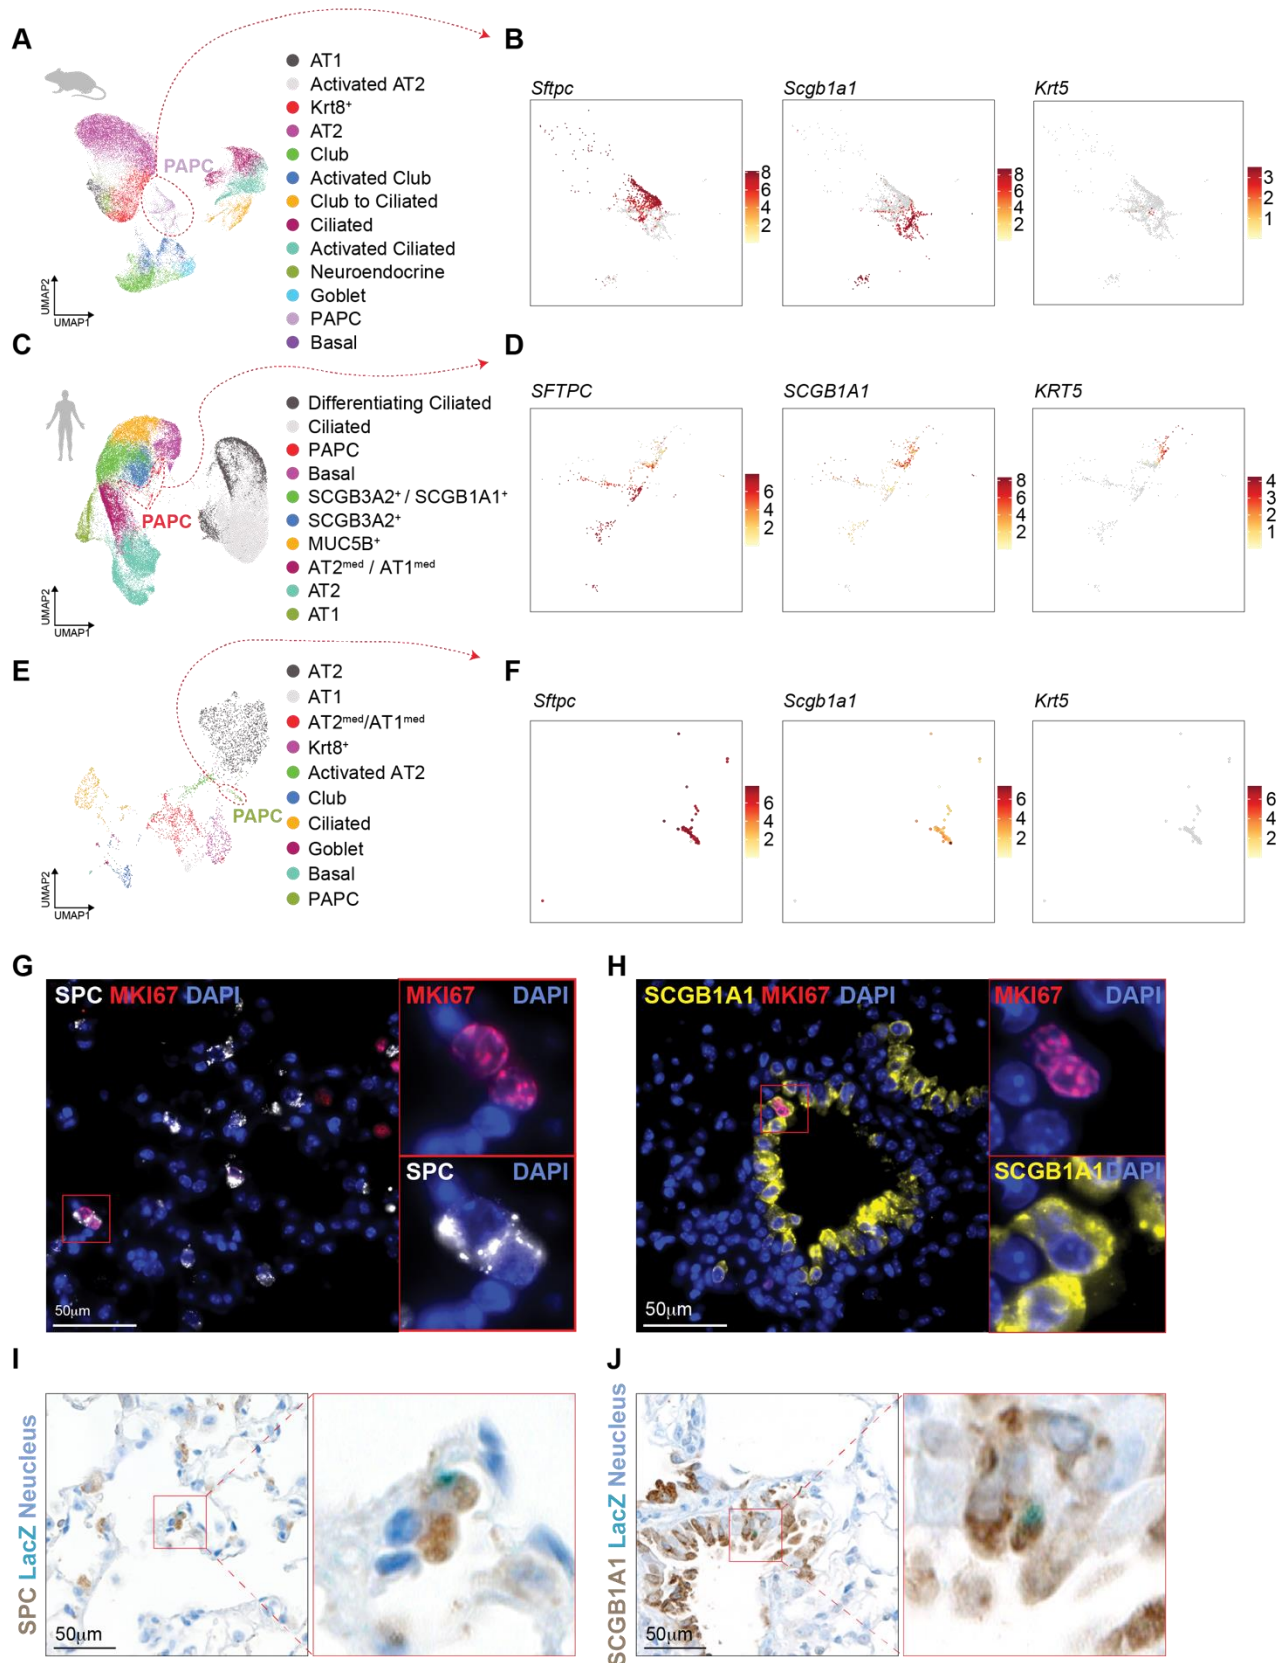

**Supplementary Fig. 9. PAPCs express various lung epithelial cell markers.**

**A** UMAPs displaying each cell cluster, colored by cell types of mouse lung shown in Figure 1A. **B** Feature plots displaying the expression of *Sftpc*, *Scgb1a1*, and *Krt5* in mouse PAPC cells. **C** UMAPs displaying each cell cluster, colored by cell types of human lung shown in Figure 1D. **D** Feature plots displaying the expression of *SFTPC*, *SCGB1A1*, and *KRT5* in human PAPC cells. **E** UMAPs displaying each cell cluster, colored by cell

128 types of mouse lung (*Pclaf* WT and KO at 7 dpi) shown in Figure 3B. **F** Feature plots displaying the expression  
129 of *Sftpc*, *Scgb1a1*, and *Krt5* in mouse PAPC cells. **G** Representative images of immunostaining for SPC and  
130 MKI67 using lung slides at 7 dpi shown in Figure 2. **H** Representative images of immunostaining for SCGB1A1  
131 and MKI67 using lung slides at 7 dpi shown in Figure 2. **I, J** Representative images of immunostaining for SPC  
132 (**I**) and SCGB1A1 (**J**) in combination with X-gal staining, using lung slides at 7 dpi are shown in Supplementary  
133 Figure 2. Representative images are shown ( $n \geq 3$ ). Graphic icons were created with BioRender.com.

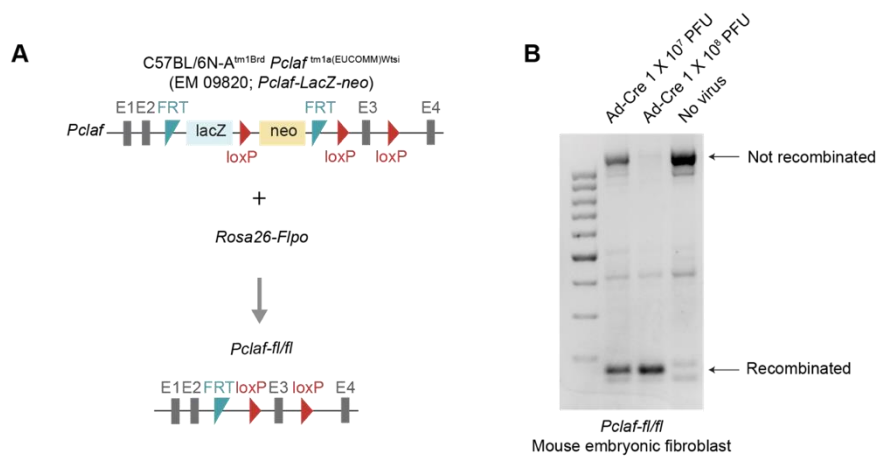

135

136

137

138

**Supplementary Fig. 10. Both germline and conditional KO of *Pclaf* inhibit AT1 cell generation from AT2 cells**

139

140

141

142

143

**A** Experimental scheme of generating of *Pclaf-fl/fl* mice. **B** Mouse embryonic fibroblasts (MEFs) were isolated from *Pclaf-fl (floxed)/fl* mice. *Pclaf-fl/fl* MEFs were treated with Ad-Cre viruses ( $1 \times 10^7$  or  $1 \times 10^8$  PFU). Conditional knock-out (cKO) by Ad-Cre was checked by PCR-based genotyping. Figure A was created with BioRender.com.

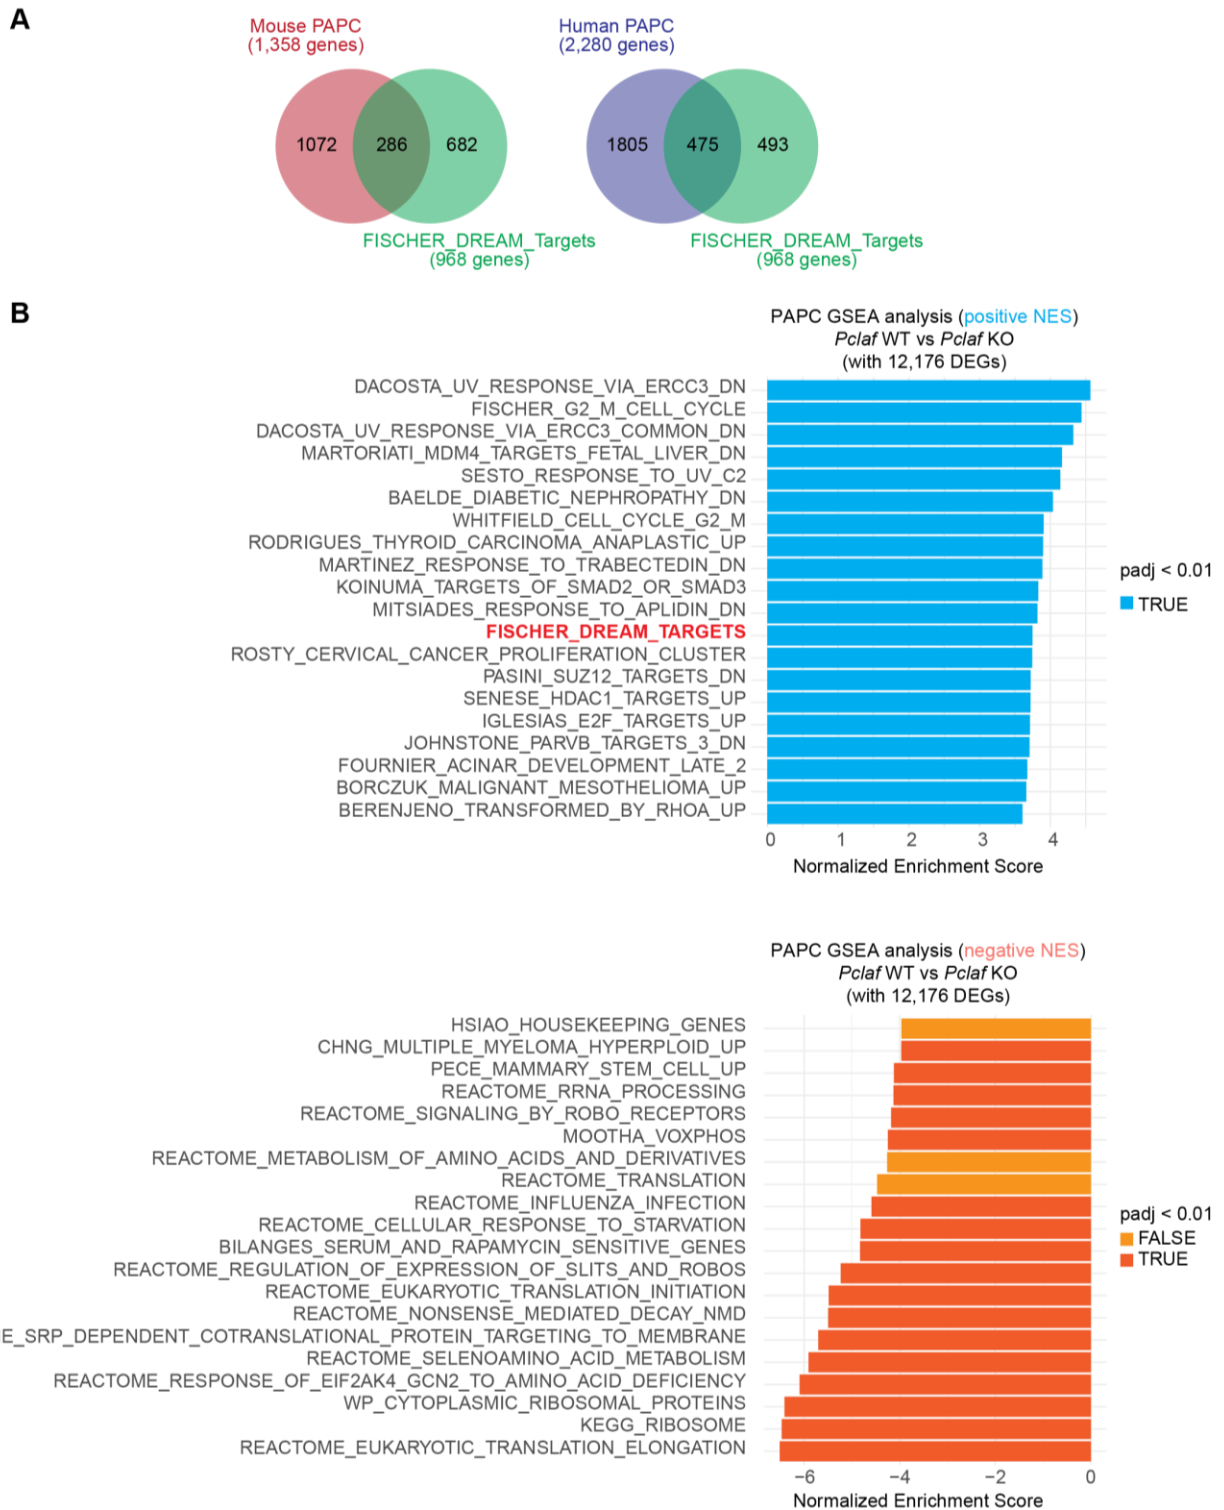

**Supplementary Fig. 11. *Pclaf* KO downregulates DREAM-target gene expression in PAPC.**

**A** Venn diagram analysis of DREAM target genes vs. genes specifically expressed in the PAPC clusters (mouse scRNA-seq dataset shown in Figure 1A or the human scRNA-seq dataset shown in Figure 1D). **B** Top 20 gene sets (*upper* panel) and bottom 20 gene sets (*bottom* panel) of GSEA with 12,176 DEGs between *Pclaf* WT PAPCs and *Pclaf* KO PAPCs in the scRNA-seq dataset shown in Figure 3.

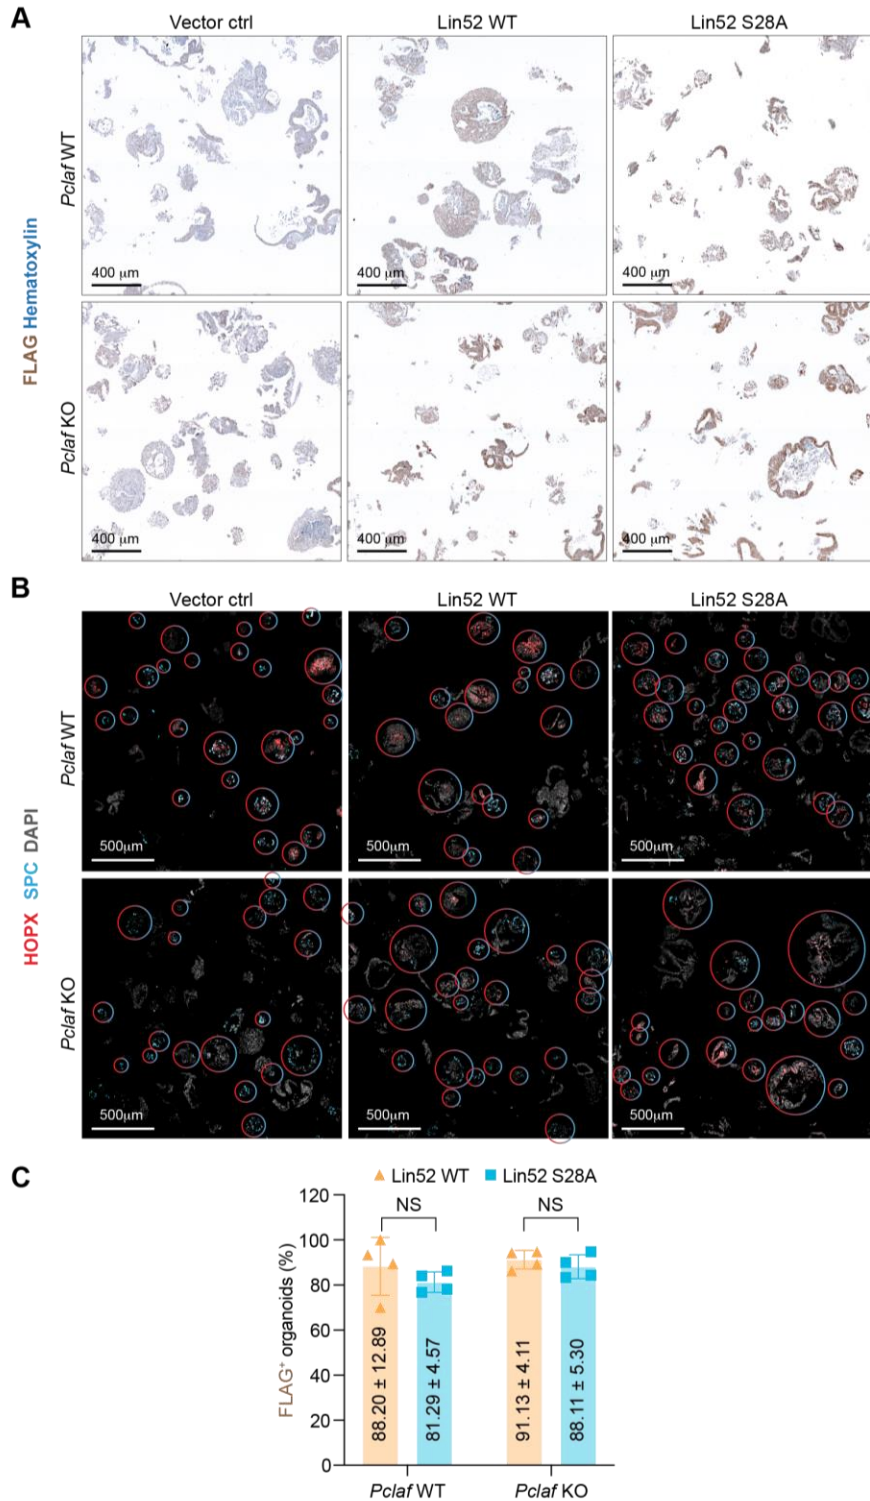

150  
151  
152  
153  
154  
155  
156

**Supplementary Fig. 12. Transduction efficiency of lentiviruses encoding Lin52-WT or Lin52 S28A in LOs**  
Isolated lung epithelial cells were transduced with RFP, Lin52 WT, or Lin52 S28A by lentivirus and then cultured with LO. **A** Representative images of chemically immunostained for FLAG. **B** Representative images of immunofluorescent (IF) staining for HOPX (AT1) and SPC (AT2) on day 14. The circles (in red-light blue mixed) indicate the relative ratio of HOPX<sup>+</sup> to SPC<sup>+</sup> cells in LOs. **C** Quantification of FLAG<sup>+</sup> LOs (n=4). Two-tailed Student's *t*-test; error bars: SD. Representative images are shown (n≥3).



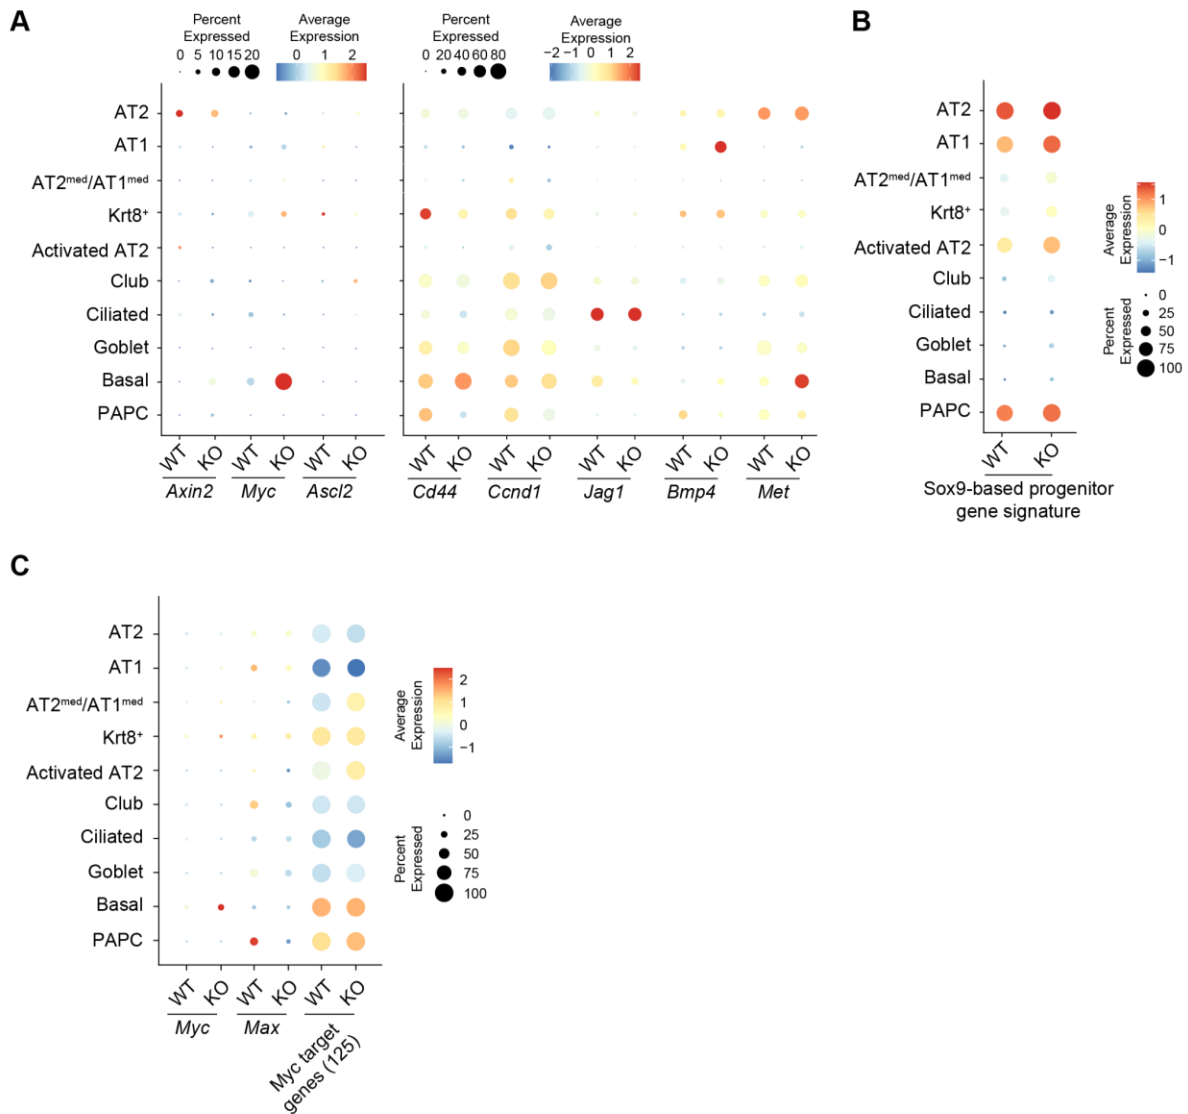

**Supplementary Fig. 13. Impact of *Pclaf* KO on Wnt signaling, Sox9, and Myc transcriptional signatures**

**A-C** Dot plots displaying each gene expression from the scRNA-seq dataset shown in Figure 3. Dot plots showing the expression of Wnt signaling target genes in each cell type (**A**). Dot plots depicting transcriptional module scores of the Sox9-based progenitor cell signature gene set (**B**). Dot plots showing the expression of *Myc* and *Max* and transcriptional module scores of the Myc target gene set (**C**). *Pclaf* KO barely alters Wnt signaling and Sox9-based progenitor transcriptional signature.

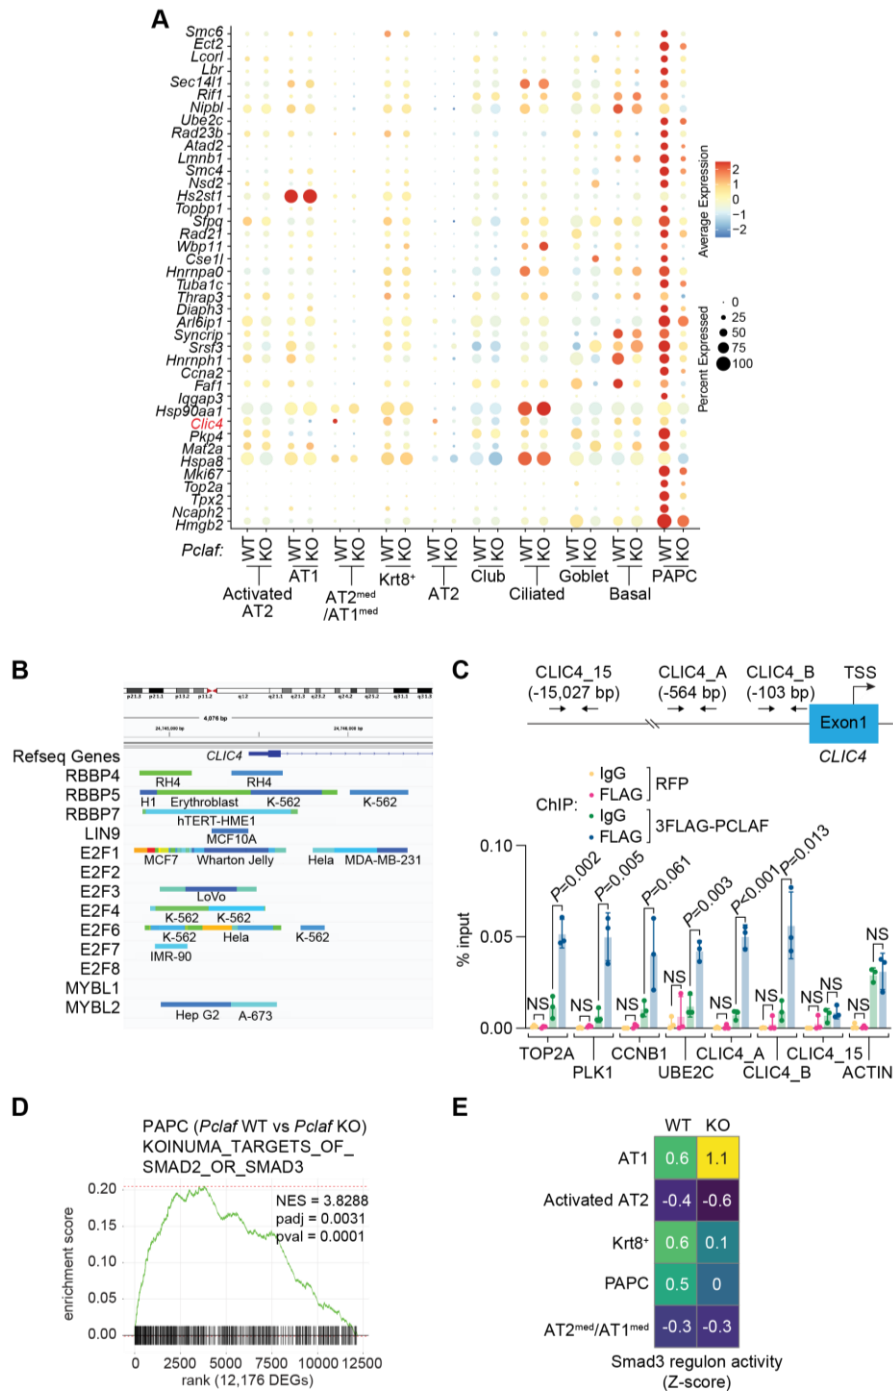

**Supplementary Fig. 14. *Clic4* downregulation is associated with decreased activity of TGF- $\beta$  signaling in *Pclaf* KO PAPCs.**

**A** Dot plots displaying the top 40 differently expressed DREAM target genes in each cell type. **B** The DREAM complex components bind to the *CLIC4* promoter in ChIP-Atlas database (chip-atlas.org). **C** qPCR analysis using indicated primer sets targeting proximal promoter of DREAM target genes, *CLIC4*, or *ACTB*. ChIP was performed using anti-FLAG antibody. H358 cells ectopically expressing 3FLAG-*PCLAF* were used for ChIP (n=3). **D** GSEA of *Pclaf* WT vs. *Pclaf* KO in the PAPC cluster using the data set shown in Figure 3. The enrichment plot presents the gene sets of SMAD2 or SMAD3 target genes. **E** Z-score of Smad3 regulon activity by cell type and genome, analyzed by pySCENIC using the data set shown in Figure 3.

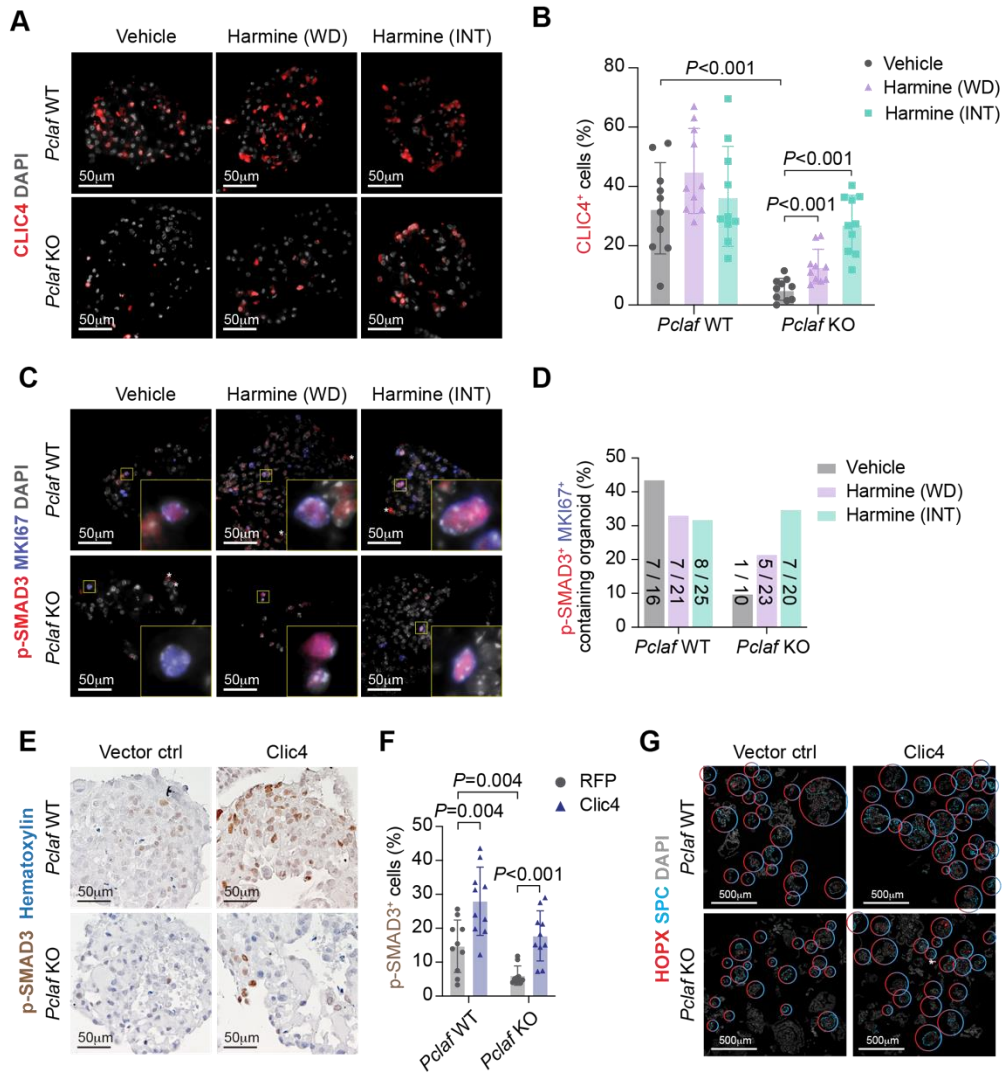

**Supplementary Fig. 15. Pharmacological or genetic activation of the DREAM axis rescues *Pclaf* KO-inhibited TGF- $\beta$  signaling.**

**A-D** LOs treated with harmine (shown in Figure 4E) were immunostained with indicated antibodies. Representative images of IF staining for CLIC4 (**A**). Quantification of the CLIC4<sup>+</sup> cells (n=10) (**B**). Representative images of IF staining for p-SMAD3 and MKI67 (**C**). Quantification of LOs containing p-SMAD3 and MKI67 double-positive cells (n=10) (**D**). **E-G** Isolated lung epithelial cells were transduced with *RFP*- or *Clic4*-expressing lentiviruses and cultured with LO. Representative images of *Pclaf* WT and *Pclaf* KO LOs at day 14, immunostained for p-SMAD3 (**E**). Quantification graph of p-SMAD3<sup>+</sup> cells (n=10) (**F**). Images of IF staining for HOPX (AT1) and SPC (AT2) on day 14. The circle color indicates the relative ratio of HOPX<sup>+</sup> to SPC<sup>+</sup> cells (**G**). Two-tailed Student's *t*-test; error bars: SD. Representative images are shown (n≥3).

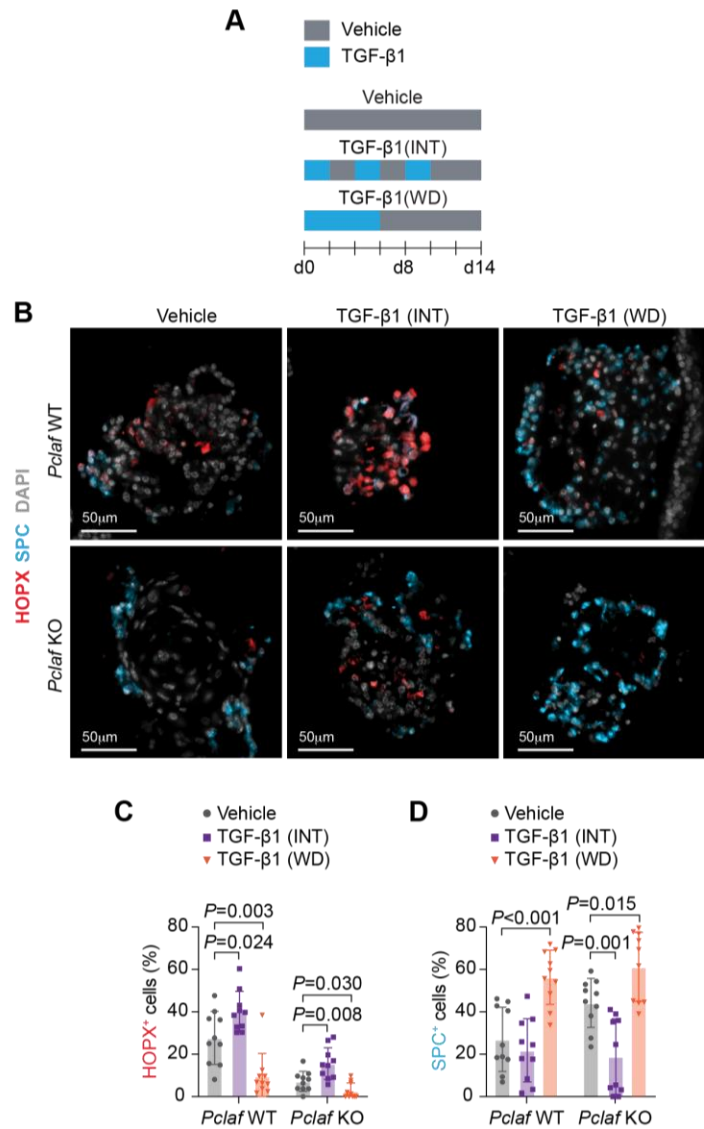

**Supplementary Fig. 16. TGF-β rescues *Pclaf* KO-impaired cell plasticity.**

Murine lung epithelial cells were cultured for LOs under stimuli of TGF-β1 (2 ng/ml). TGF-β1 was used to treat LOs for the first 6 days and withdrawn (WD). Alternatively, LOs were cultured with TGF-β1 intermittently (INT) at the indicated time points. **A** Experimental scheme for LO culture. **B** Representative images of IF staining for HOPX (AT1) and SPC (AT2) on day 14. **C, D** Quantification of HOPX<sup>+</sup> (n=10) (**C**) and SPC<sup>+</sup> cells (n=10) (**D**). Two-tailed Student's *t*-test; error bars: SD. The representative images are shown (n≥3). TGF-β1 (INT) rescued *Pclaf* KO-impaired alveolar cell plasticity (AT1 cell generation from AT2 cells). In contrast, TGF-β1 (WD) inhibited AT1 cell generation regardless of *Pclaf* WT and *Pclaf* KO. These data suggest that the temporal activity of TGF-β signaling is pivotal for AT2-to-AT1 cell transition. Of note, this experiment was designated by two rationales. First, signaling pathways elicit various outcomes depending on the spatiotemporal and dosage of signaling cues<sup>2-4</sup>. For example, intermittent or continuous stimulation of parathyroid hormone (PTH) can result in either increased or decreased bone mass, respectively<sup>5</sup>. Second, the balance between proliferation and differentiation is critical in organoid culture in general and TGF-β signaling has been shown to inhibit the proliferation of alveolar cells<sup>6</sup>. Since TGF-β generally inhibits cell proliferation, we thought that stimulation of TGF-β during the whole period would severely inhibit organoid formation and growth. Thus, to reduce the inhibitory effect of TGF-β, we cultured the LOs under TGF-β stimulation of half period of culture with two different models. The INT model aimed to continuously alter the organoid culture condition between TGF-β1 stimulation and depletion, while the WD model aimed to provide continuous TGF-β1 stimulation at the early stage of LO culture.

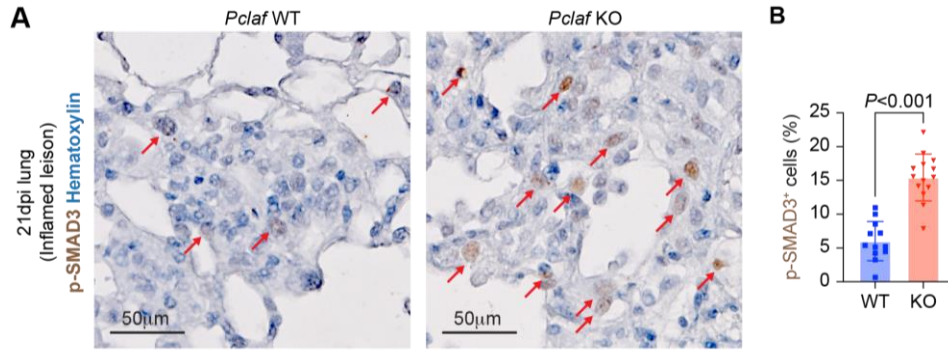

**Supplementary Fig. 17. Elevated TGF- $\beta$  signaling in inflamed lesions of *Pclaf* KO lung tissues**

**A** Images of immunostaining for p-SMAD3 of the inflamed lesion from *Pclaf* WT (n=12) and *Pclaf* KO (n=14) lung tissues at 21 dpi. **B** Quantification graph of p-SMAD3<sup>+</sup> cells. Two-tailed Student's *t*-test; error bars: SD. Representative images are shown (n $\geq$ 3).

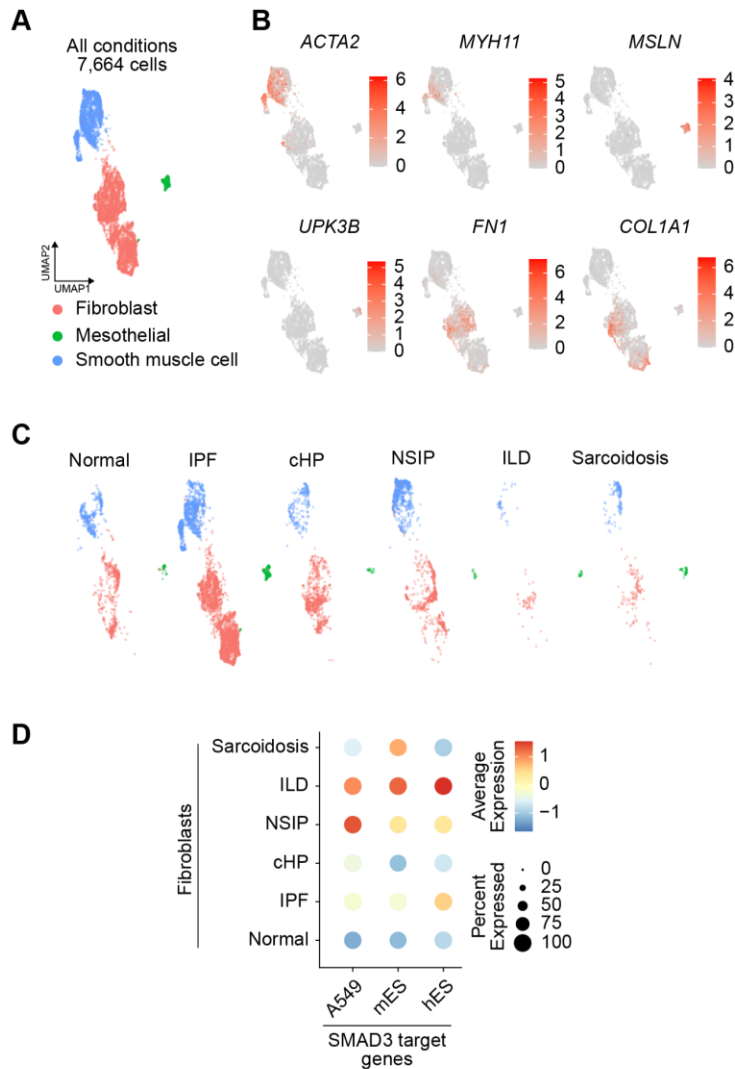

**Supplementary Fig. 18. Elevated TGF- $\beta$  signaling in lung fibroblasts of IPF patients**

**A** UMAP showing the Mesenchymal compartment (*EPCAM*, *PTPRC*, and *PECAM1* cells) from the human scRNA-seq dataset (GSE135893; normal, IPF, cHP, NSIP, ILD, and Sarcoidosis). **B** Feature plots of indicated marker genes: *ACTA2* and *MYH11* for smooth muscle cells; *MSLN* and *UPK3B* for mesothelial cells; *FN1* and *COL1A1* for fibroblasts. **C** UMAP embedding displays cells colored by cell types split by each disease type. **D** Dot plots showing the expression of indicated genes and module scores of SMAD3-target gene sets in human lung fibroblasts.

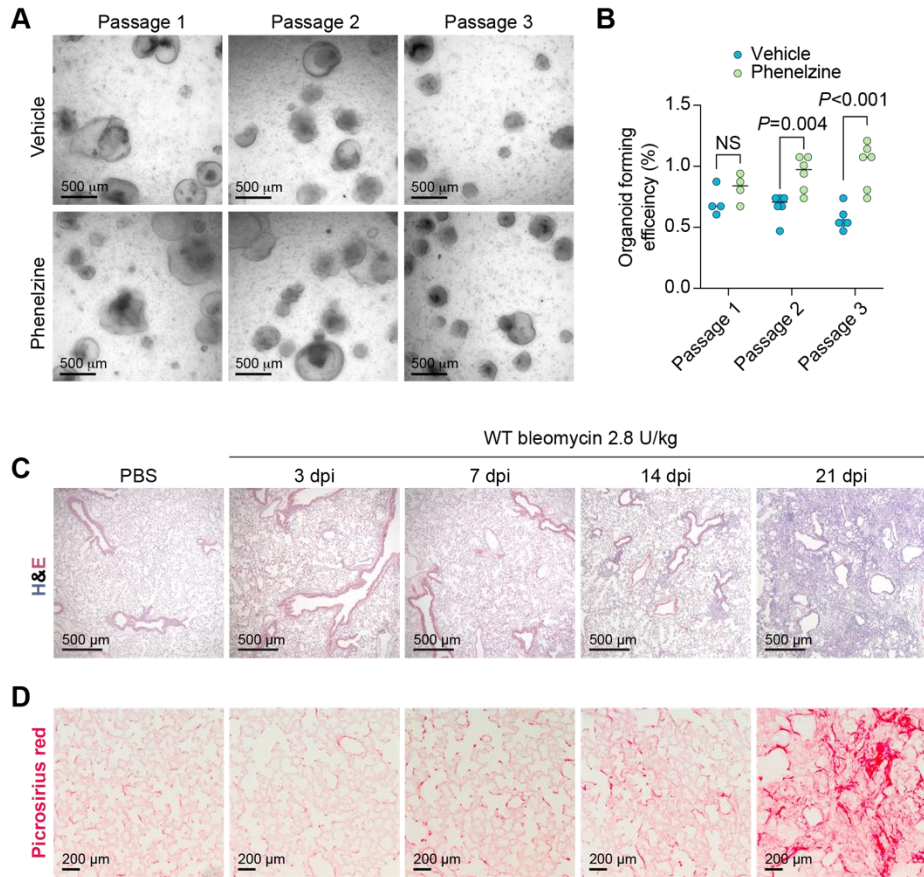

**Supplementary Fig. 19. Phenelzine promotes LO formation.**

**A** Images of LOs with phenelzine (10  $\mu$ M) at 12 days of indicated passage. **B** Quantification graph of lung OFE at 12 days of passage (n=4 for passage 1, n=6 for passage 2 and 3). **C, D** 8-week-old C57BL/6 mice were treated with PBS (n=3) or bleomycin (2.8 U/kg, n=3 of each group) by intratracheal instillation. Lung tissues were collected at indicated time points. Lungs with PBS were collected at the same time point of 21 dpi. Representative images of H&E staining at the indicated time points (**C**). Representative images of picrosirius red staining at the indicated time points (**D**). Two-tailed Student's *t*-test; error bars: SD. Representative images are shown (n $\geq$ 3).

Supplementary Fig. 2A

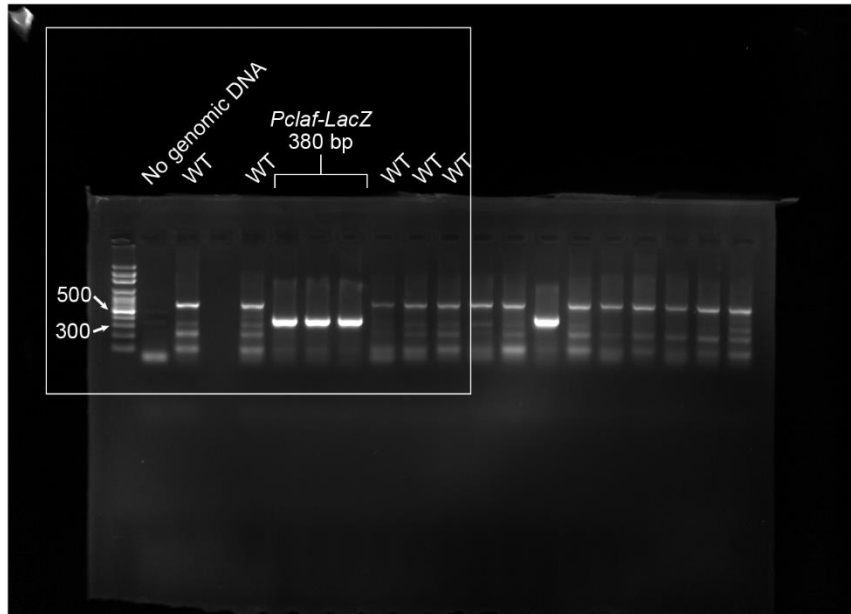

Supplementary Fig. 10B

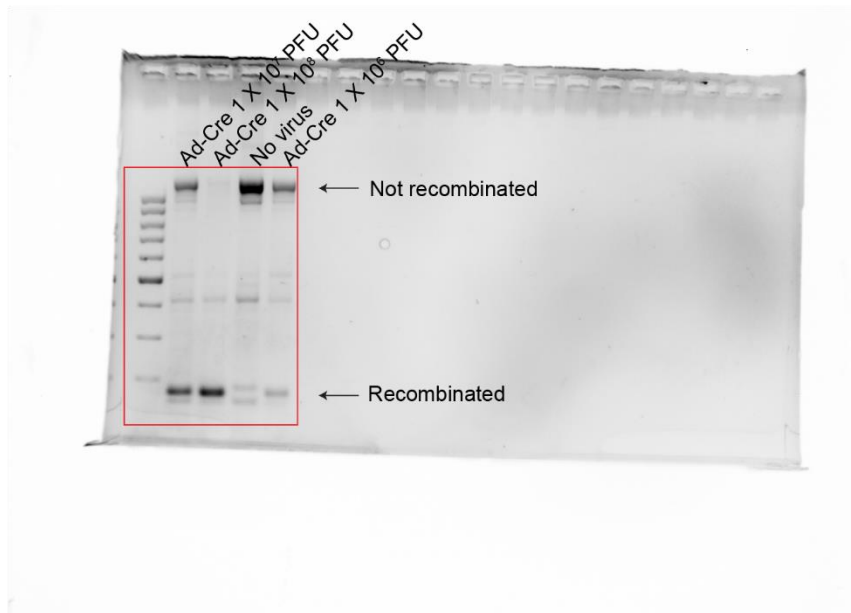

225 **Supplementary Fig. 20. Source data**

226 Raw uncropped agarose gel images shown in Supplementary Figure 2A and 10B.



227 **Supplementary References**  
228  
229

- 230 1 Kim, M. J. *et al.* PAF-Myc-Controlled Cell Stemness Is Required for Intestinal Regeneration and  
231 Tumorigenesis. *Dev. Cell* **44**, 582-+, doi:10.1016/j.devcel.2018.02.010 (2018).  
232 2 Fowell, D. J. & Kim, M. The spatio-temporal control of effector T cell migration. *Nat Rev Immunol* **21**,  
233 582-596, doi:10.1038/s41577-021-00507-0 (2021).  
234 3 Araque, A. *et al.* Gliotransmitters travel in time and space. *Neuron* **81**, 728-739,  
235 doi:10.1016/j.neuron.2014.02.007 (2014).  
236 4 Barrientos, S., Stojadinovic, O., Golinko, M. S., Brem, H. & Tomic-Canic, M. Growth factors and  
237 cytokines in wound healing. *Wound Repair Regen* **16**, 585-601, doi:10.1111/j.1524-475X.2008.00410.x  
238 (2008).  
239 5 Silva, B. C. & Bilezikian, J. P. Parathyroid hormone: anabolic and catabolic actions on the skeleton.  
240 *Curr Opin Pharmacol* **22**, 41-50, doi:10.1016/j.coph.2015.03.005 (2015).  
241 6 Riemondy, K. A. *et al.* Single cell RNA sequencing identifies TGF $\beta$  as a key regenerative cue following  
242 LPS-induced lung injury. *JCI Insight* **5**, doi:10.1172/jci.insight.123637 (2019).  
243
