# Supplementary material for: PCLAF-DREAM drives alveolar cell plasticity for lung regeneration
Source: PubMed Central journal article supplement (PMC11502753; doi:10.1038/s41467-024-53330-1), 2024-10-24
Supplement: 41467_2024_53330_MOESM12_ESM.pdf [file 41467_2024_53330_MOESM12_ESM.pdf]

## Reporting Summary

Nature Portfolio wishes to improve the reproducibility of the work that we publish. This form provides structure for consistency and transparency in reporting. For further information on Nature Portfolio policies, see our [Editorial Policies](#) and the [Editorial Policy Checklist](#).

### Statistics

For all statistical analyses, confirm that the following items are present in the figure legend, table legend, main text, or Methods section.

n/a Confirmed

- The exact sample size ( $n$ ) for each experimental group/condition, given as a discrete number and unit of measurement
- A statement on whether measurements were taken from distinct samples or whether the same sample was measured repeatedly
- The statistical test(s) used AND whether they are one- or two-sided  
*Only common tests should be described solely by name; describe more complex techniques in the Methods section.*
- A description of all covariates tested
- A description of any assumptions or corrections, such as tests of normality and adjustment for multiple comparisons
- A full description of the statistical parameters including central tendency (e.g. means) or other basic estimates (e.g. regression coefficient) AND variation (e.g. standard deviation) or associated estimates of uncertainty (e.g. confidence intervals)
- For null hypothesis testing, the test statistic (e.g.  $F$ ,  $t$ ,  $r$ ) with confidence intervals, effect sizes, degrees of freedom and  $P$  value noted  
*Give  $P$  values as exact values whenever suitable.*
- For Bayesian analysis, information on the choice of priors and Markov chain Monte Carlo settings
- For hierarchical and complex designs, identification of the appropriate level for tests and full reporting of outcomes
- Estimates of effect sizes (e.g. Cohen's  $d$ , Pearson's  $r$ ), indicating how they were calculated

*Our web collection on [statistics for biologists](#) contains articles on many of the points above.*

### Software and code

Policy information about [availability of computer code](#)

Data collection

Data analysis https://zenodo.org/records/13871131) and will also be available upon request. Softwares and Packages used in this study were described below."/>

Softwares

R 4.0.3  
Python 3.9.7

R packages

Seurat 4.1.0  
CytoTRACE 0.3.3  
scProportionTest 0.0.0.9000  
fgsea 1.16.0  
dplyr 1.0.8  
ggplot2 3.3.5  
matrix 1.4-0  
ade4 1.7-18  
presto 1.0.0  
SeuratDisk 0.0.0.9019  
SeuratWrappers 0.3.0

Nebulosa 1.0.2  
 Cowplot 1.1.1  
 dittoSeq 1.2.6  
 ggpubr 0.4.0  
 scClustViz 1.3.8

Python Packages  
 ScVelo 0.2.4  
 pyscenic 0.11.2  
 pandas 1.3.3  
 scanpy 1.8.1  
 numpy 1.21.2  
 scipy 1.7.1  
 Loompy 3.0.6  
 Anndata 0.7.6  
 umap 0.5.2  
 scikit-learn 1.0.2  
 statsmodels 0.13.1  
 python-igraph 0.9.9  
 pynndescent 0.5.6

For manuscripts utilizing custom algorithms or software that are central to the research but not yet described in published literature, software must be made available to editors and reviewers. We strongly encourage code deposition in a community repository (e.g. GitHub). See the Nature Portfolio [guidelines for submitting code & software](#) for further information.

## Data

Policy information about [availability of data](#)

All manuscripts must include a [data availability statement](#). This statement should provide the following information, where applicable:

- Accession codes, unique identifiers, or web links for publicly available datasets
- A description of any restrictions on data availability
- For clinical datasets or third party data, please ensure that the statement adheres to our [policy](#)

scRNA-seq data are available via the Gene Expression Omnibus (GSE205815; <https://www.ncbi.nlm.nih.gov/geo/query/acc.cgi?acc=GSE205815>).

## Research involving human participants, their data, or biological material

Policy information about studies with [human participants or human data](#). See also policy information about [sex, gender \(identity/presentation\), and sexual orientation](#) and [race, ethnicity and racism](#).

Reporting on sex and gender

Reporting on race, ethnicity, or other socially relevant groupings

Population characteristics

Recruitment

Ethics oversight

Note that full information on the approval of the study protocol must also be provided in the manuscript.

## Field-specific reporting

Please select the one below that is the best fit for your research. If you are not sure, read the appropriate sections before making your selection.

Life sciences  Behavioural & social sciences  Ecological, evolutionary & environmental sciences

For a reference copy of the document with all sections, see [nature.com/documents/nr-reporting-summary-flat.pdf](https://nature.com/documents/nr-reporting-summary-flat.pdf)

## Life sciences study design

All studies must disclose on these points even when the disclosure is negative.

Sample size

For all in vitro experiment, the number of samples sizes are three or above. For animal studies, sample sizes were estimated by power calculation.

|                 |                                                                                                                                         |
|-----------------|-----------------------------------------------------------------------------------------------------------------------------------------|
| Data exclusions | No samples or animals were excluded. Also, the criteria were not pre-established in experiments.                                        |
| Replication     | All experiments were performed using at least three biological replicas unless specified. All experiments were successfully replicated. |
| Randomization   | All mice were randomized in each groups.                                                                                                |
| Blinding        | N/A                                                                                                                                     |

## Reporting for specific materials, systems and methods

We require information from authors about some types of materials, experimental systems and methods used in many studies. Here, indicate whether each material, system or method listed is relevant to your study. If you are not sure if a list item applies to your research, read the appropriate section before selecting a response.

### Materials & experimental systems

### Methods

| n/a                                 | Involved in the study                                           | n/a                                 | Involved in the study                           |
|-------------------------------------|-----------------------------------------------------------------|-------------------------------------|-------------------------------------------------|
| <input type="checkbox"/>            | <input checked="" type="checkbox"/> Antibodies                  | <input checked="" type="checkbox"/> | <input type="checkbox"/> ChIP-seq               |
| <input type="checkbox"/>            | <input checked="" type="checkbox"/> Eukaryotic cell lines       | <input checked="" type="checkbox"/> | <input type="checkbox"/> Flow cytometry         |
| <input checked="" type="checkbox"/> | <input type="checkbox"/> Palaeontology and archaeology          | <input checked="" type="checkbox"/> | <input type="checkbox"/> MRI-based neuroimaging |
| <input type="checkbox"/>            | <input checked="" type="checkbox"/> Animals and other organisms |                                     |                                                 |
| <input checked="" type="checkbox"/> | <input type="checkbox"/> Clinical data                          |                                     |                                                 |
| <input checked="" type="checkbox"/> | <input type="checkbox"/> Dual use research of concern           |                                     |                                                 |
| <input checked="" type="checkbox"/> | <input type="checkbox"/> Plants                                 |                                     |                                                 |

## Antibodies

### Antibodies used

IHC  
 anti-PCLAF (Abcam, ab226255, 1:100)  
 anti-PCLAF (Abcam, ab56773, 1:100)  
 anti-SMA (Abcam, ab5694, 1:200)  
 anti-RAGE (R&D, MAB1179-100, 1:100)  
 anti-SPC (Abcam, ab40879, 1:200)  
 anti-SCGB1A1 (Abcam, ab40873, 1:200)  
 anti-Ac-TUB (Sigma, T6793, 1:200)  
 anti-HOPX (Santacruz, sc-398703, 1:100)  
 anti-CLIC4 (Cell signaling, 12644S, 1:200)  
 anti-p-SMAD3 (S423 + S425) (Abcam, ab52903, 1:200)  
 anti-KI67 (Cell signaling, 9449S, 1:200)  
 anti-FLAG (Abcam, ab205606, 1:200)  
 anti-CC3 (Cell signaling, 9664s, 1:200)  
 anti-CDH1 (BD, 610182, 1:200)  
 anti-KRT8 (DSHB, DSHB TROMA-I, 1:200)  
 anti-LCN2 (R&D, AF1857-SP, 1:200)  
 anti-CD45 (Abcam, ab10558, 1:100)  
 anti-CD44 (BD, 550538, 1:200)  
 anti-FN (BD, 610078, 1:200)

ChIP  
 anti-FLAG (Sigma, F3040, 1:200)  
 anti-PCLAF (Abcam, ab226255, 1:200)

### Validation

All antibodies were commercially validated (see manufacturer's website link below)  
 anti-PCLAF (Abcam, ab226255)  
<https://www.abcam.com/products/primary-antibodies/kiaa0101-antibody-ab2anti-PCLAF> (Abcam, ab56773,  
 anti-PCLAF (Abcam, ab56773, 1:100)  
<https://www.abcam.com/products/primary-antibodies/kiaa0101-antibody-ab56773.html>  
 anti-SMA (Abcam, ab5694)  
<https://www.abcam.com/products/primary-antibodies/alpha-smooth-muscle-actin-antibody-ab5694.html>  
 anti-RAGE (R&D, MAB1179-100)  
[https://www.rndsystems.com/products/mouse-rat-rage-antibody-175410\\_mab1179](https://www.rndsystems.com/products/mouse-rat-rage-antibody-175410_mab1179)  
 anti-SPC (Abcam, ab40879)  
<https://www.abcam.com/products/primary-antibodies/prosurfactant-protein-c-antibody-ab40879.html>  
 anti-SCGB1A1 (Abcam, ab40873)  
<https://www.abcam.com/products/primary-antibodies/uteroglobin-antibody-ab40873.html>  
 anti-Ac-TUB (Sigma, T6793)  
<https://www.sigmaaldrich.com/US/en/product/sigma/t6793>  
 anti-HOPX (Santacruz, sc-398703)

<https://www.scbt.com/p/hop-antibody-e-1>  
 anti-CLIC4 (Cell signaling, 12644S)  
[https://www.cellsignal.com/products/primary-antibodies/clic4-d2a7d-rabbit-mab/12644?\\_requestid=2136261](https://www.cellsignal.com/products/primary-antibodies/clic4-d2a7d-rabbit-mab/12644?_requestid=2136261)  
 anti-p-SMAD3 (S423 + S425) (Abcam, ab52903)  
<https://www.abcam.com/products/primary-antibodies/smad3-phospho-s423--s425-antibody-ep823y-ab52903.html>  
 anti-KI67 (Cell signaling, 9449S)  
<https://www.cellsignal.com/products/primary-antibodies/ki-67-8d5-mouse-mab/9449>  
 anti-FLAG (Abcam, ab205606)  
<https://www.abcam.com/products/primary-antibodies/ddddk-tag-binds-to-flag-tag-sequence-antibody-epr20018-251-ab205606.html>  
 anti-CC3 (Cell signaling, 9664s)  
<https://www.cellsignal.com/products/primary-antibodies/cleaved-caspase-3-asp175-5a1e-rabbit-mab/9664>  
 anti-CDH1 (BD, 610182)  
<https://www.bdbiosciences.com/en-us/products/reagents/microscopy-imaging-reagents/immunofluorescence-reagents/purified-mouse-anti-e-cadherin.610182>  
 anti-KRT8 (DSHB, DSHB TROMA-I)  
<https://dshb.biology.uiowa.edu/TROMA-I>  
 anti-LCN2 (R&D, AF1857-SP)  
[https://www.rndsystems.com/products/mouse-lipocalin-2-ngal-antibody\\_af1857](https://www.rndsystems.com/products/mouse-lipocalin-2-ngal-antibody_af1857)  
 anti-CD45 (Abcam, ab10558)  
<https://www.abcam.com/products/primary-antibodies/cd45-antibody-ab10558.html>  
 anti-CD44 (BD, 550538)  
<https://www.bdbiosciences.com/en-us/products/reagents/flow-cytometry-reagents/research-reagents/single-color-antibodies-ruo/purified-rat-anti-mouse-cd44.550538>  
 anti-FN (BD, 610078)  
<https://www.bdbiosciences.com/en-us/products/reagents/flow-cytometry-reagents/research-reagents/single-color-antibodies-ruo/purified-mouse-anti-fibronectin.610078>  
 anti-FLAG (Sigma, F3040)  
<https://www.sigmaaldrich.com/US/en/product/sigma/f3040>

## Eukaryotic cell lines

Policy information about [cell lines and Sex and Gender in Research](#)

|                                                                      |                                                                             |
|----------------------------------------------------------------------|-----------------------------------------------------------------------------|
| Cell line source(s)                                                  | H358 lung adenocarcinoma cell line was purchased from ATCC (ATCC, CRL5807). |
| Authentication                                                       | We have not performed additional authentication.                            |
| Mycoplasma contamination                                             | Cells were negative for mycoplasma contamination                            |
| Commonly misidentified lines<br>(See <a href="#">ICLAC</a> register) | No commonly misidentified cell lines were used in this study                |

## Animals and other research organisms

Policy information about [studies involving animals](#); [ARRIVE guidelines](#) recommended for reporting animal research, and [Sex and Gender in Research](#)

|                         |                                                                                                                                                                                                                                                                                                                                                                                                                                                                                                                                                                                                                                                                                                                                                                                                                                                                                                                                                           |
|-------------------------|-----------------------------------------------------------------------------------------------------------------------------------------------------------------------------------------------------------------------------------------------------------------------------------------------------------------------------------------------------------------------------------------------------------------------------------------------------------------------------------------------------------------------------------------------------------------------------------------------------------------------------------------------------------------------------------------------------------------------------------------------------------------------------------------------------------------------------------------------------------------------------------------------------------------------------------------------------------|
| Laboratory animals      | <p>Wild type C57BL/6J mice were purchased from Jackson laboratory (RRID: IMSR_JAX:000664).<br/>           Pclaf KO mice were generated in previous study. (2018. Developmental Cell. DOI: <a href="https://doi.org/10.1016/j.devcel.2018.02.010">https://doi.org/10.1016/j.devcel.2018.02.010</a>).<br/>           Pclaf-LacZ-neo mice were purchased from EMMA (EMMA ID: EM09820).<br/>           CMV-Cre mice were purchased from Jackson laboratory (IMSR_JAX:006054).<br/>           Rosa26-Flp1 mice were purchased from Jackson laboratory (RRID:IMSR_JAX:009086).<br/>           Sftpc-CreERT2; Rosa26-Sun1GFP mice were kindly provided by Dr. Jichao Chen (M.D. Anderson Cancer Center)<br/>           Pclaf-LacZ mice were established in this study by breeding Pclaf-LacZ-neo mice with CMV-Cre driver mice.<br/>           Pclaf-fl/fl mice were established in this study by breeding Pclaf-LacZ-neo mice with Rosa26-Flp1 driver mice.</p> |
| Wild animals            | The study did not involve wild animals                                                                                                                                                                                                                                                                                                                                                                                                                                                                                                                                                                                                                                                                                                                                                                                                                                                                                                                    |
| Reporting on sex        | This information has not been collected, as it is irrelevant to our study.                                                                                                                                                                                                                                                                                                                                                                                                                                                                                                                                                                                                                                                                                                                                                                                                                                                                                |
| Field-collected samples | The study did not involve field-collected samples.                                                                                                                                                                                                                                                                                                                                                                                                                                                                                                                                                                                                                                                                                                                                                                                                                                                                                                        |
| Ethics oversight        | All mouse experiments were approved by the MD Anderson Institutional Animal Care and Use Committee and performed under MD Anderson guidelines and the Association for Assessment and Accreditation of Laboratory Animal Care international standards.                                                                                                                                                                                                                                                                                                                                                                                                                                                                                                                                                                                                                                                                                                     |

Note that full information on the approval of the study protocol must also be provided in the manuscript.
